# Supplementary material for: TiO2-facet-dependent reconstruction of Pt nanoparticles during CO oxidation
Source: Research Square preprint supplement (doi:10.21203/rs.3.rs-7490148/v1), 2025-09-10
Supplement: Supplementary file 1 [file 45710d04a5ba809bfd4a24ff.docx]

**Supplementary Information**

**TiO2-facet-dependent reconstruction of Pt nanoparticles during CO oxidation**

Jihun Kim†1, Yunkyung Kim†2, Daewon Oh1, Seokhyun Choung2, Hyeongeon Lee1, Hogyun Lee1, Eonu Nam1, Shinjae Lee1, Jeongjin Kim3, Sinmyung Yoon1,4*, Jeong Woo Han2*, and Kwangjin An1*

*1School of Energy and Chemical Engineering, Ulsan National Institute of Science and Technology (UNIST), Ulsan 44919, Republic of Korea*

*2**Department of Materials Science and Engineering, Research Institute of Advanced Materials, Seoul National University, Seoul 08826, Republic of Korea.*

*3Pohang Light Source II, Pohang University of Science and Technology (POSTECH), Pohang, Gyeongbuk 37673, Republic of Korea*

*4Current Address: Delaware Energy Institute, University of Delaware, 221 Academy St., Newark, DE 19716, United States*

*These authors contributed equally to this work. Correspondence and requests for materials should be addressed to S.Y. (smyoon@udel.edu), J.H. (email: jwhan98@snu.ac.kr) and K.A. (email: kjan@unist.ac.kr).

**This file includes:**

Supplementary Fig. 1 to 33

Supplementary Table 1 to 5

Supplementary Note

**
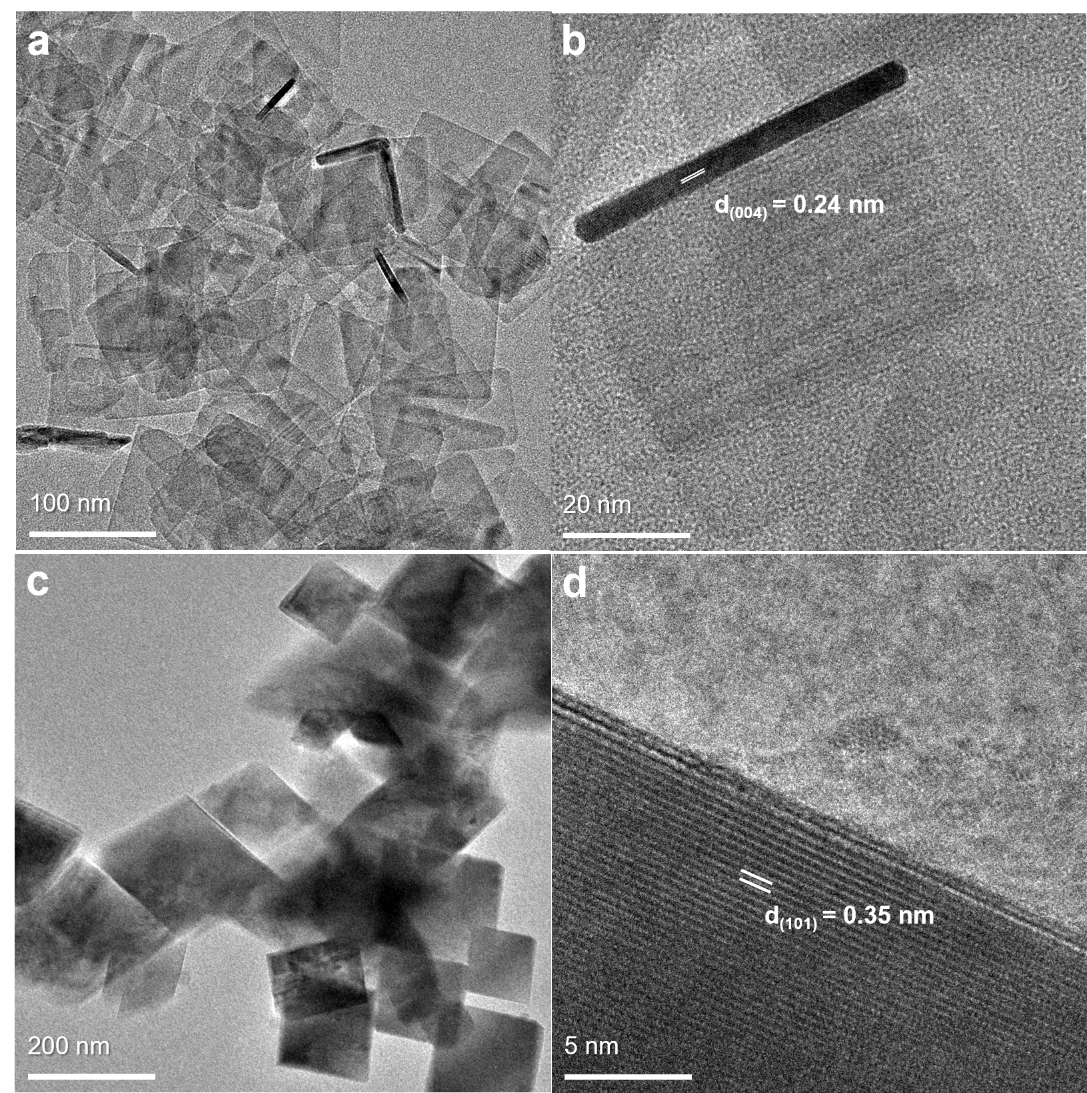
**

**Supplementary Figure 1.** (a–d) TEM images of as-synthesized TiO2 crystals with controlled morphologies: (a–b) nanosheets predominantly exposing the (001) facet and (c–d) rhombic-shaped crystals primarily exposing the (101) facet.

**
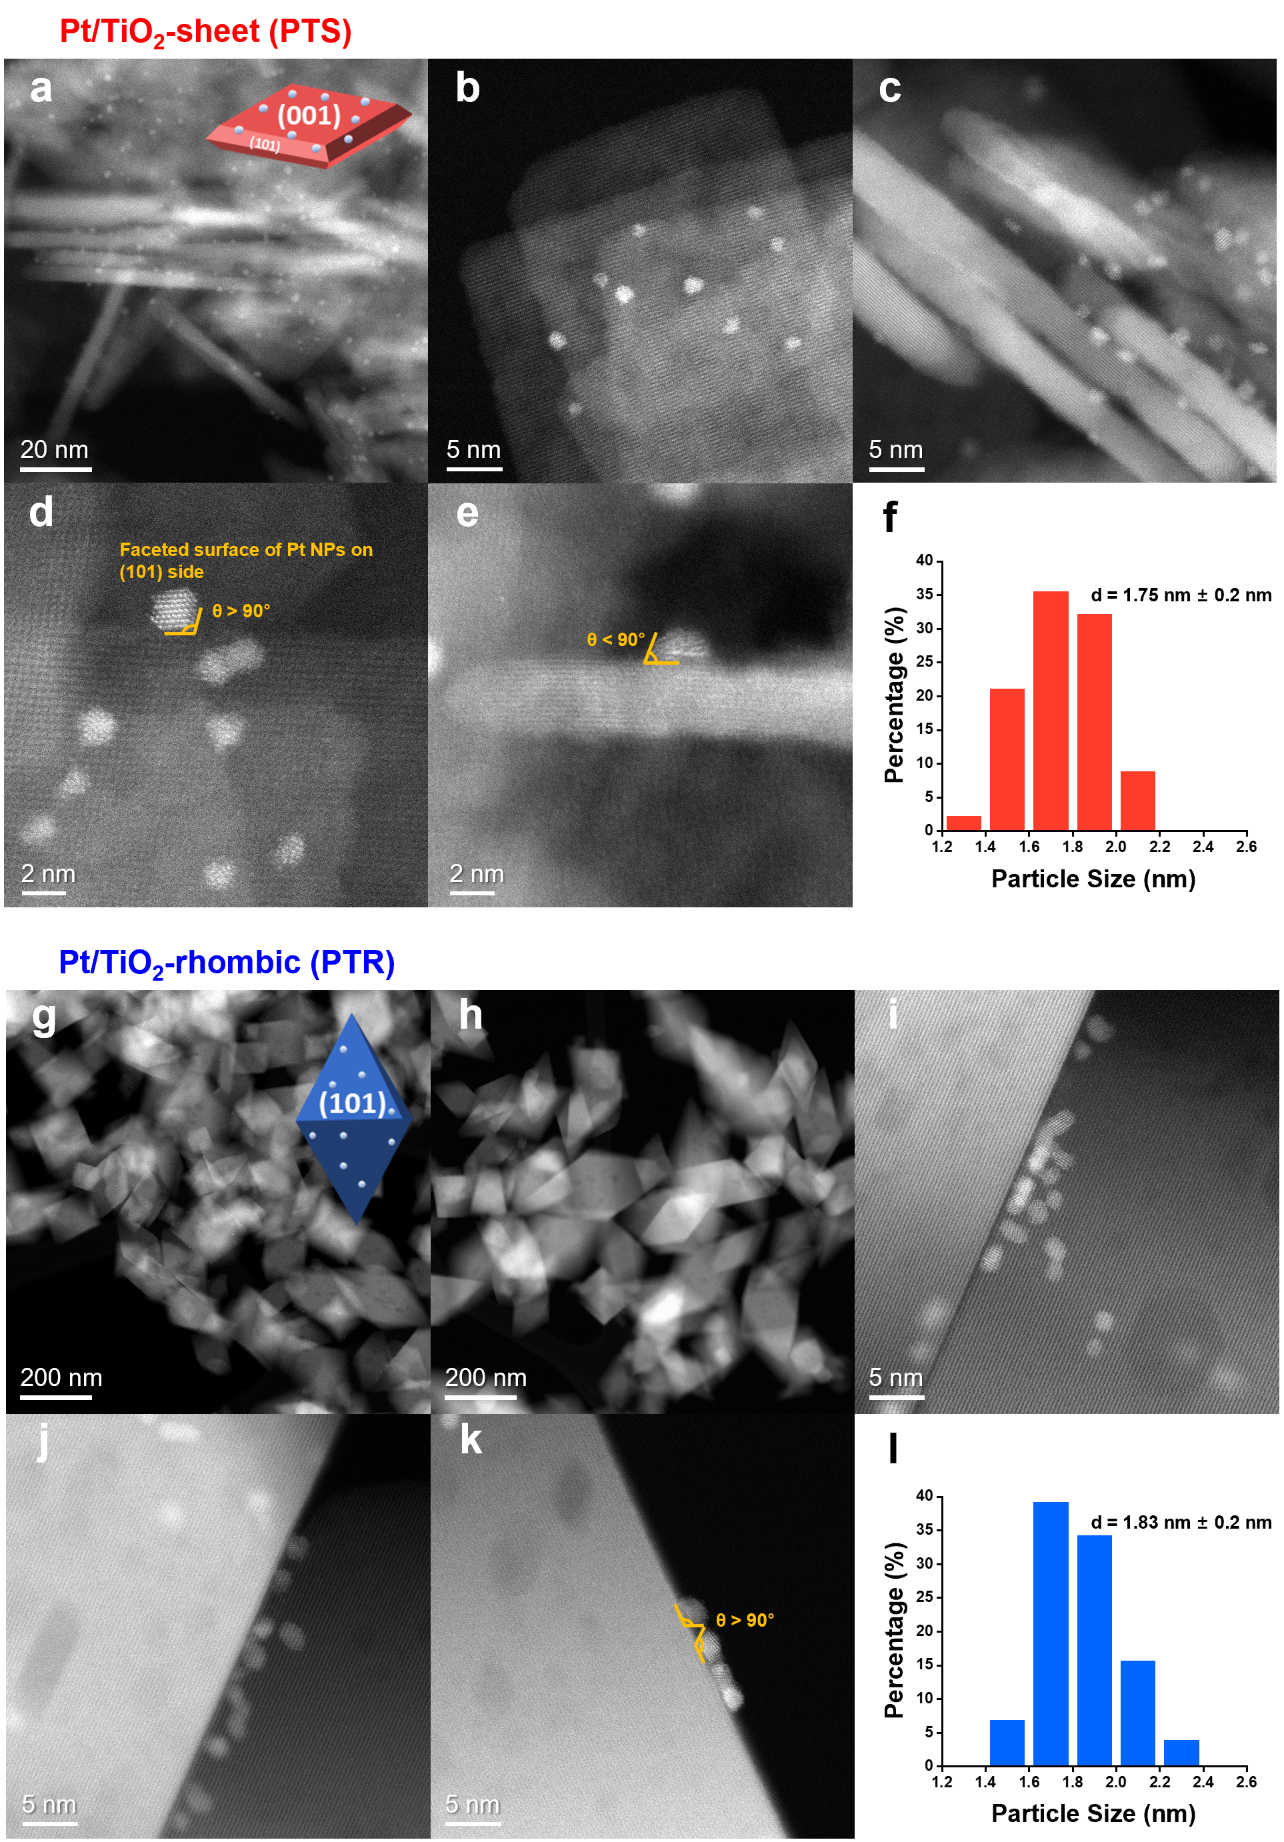

Supplementary Figure 2.** (a–e, g–k) HAADF-STEM images of the as-prepared Pt/TiO2 catalysts: (a–e) PTS with exposed (001) facets and (g–k) PTR with exposed (101) facets. (f, l) Corresponding histograms showing the Pt NP size distributions for (f) PTS and (l) PTR.

**Supplementary Table 1. Physicochemical properties of Pt/TiO2 catalysts, including average Pt particle size, Pt loading, CO chemisorption capacity, and dispersion.**

| Catalysts | Pt size by TEM  (nm)a | Pt  (wt %)b | Chemisorbed CO  (mmol·g-1)c | *D*Pt  (%)d |
| --- | --- | --- | --- | --- |
| PTS | 1.75 0.2 | 0.32 | 0.00897 | 51.5 |
| PTR | 1.83 0.2 | 0.45 | 0.01038 | 49.1 |

aAverage Pt particle size determined from HAADF-STEM analysis.
bPt content measured by ICP-OES
c Chemisorbed CO amount estimated by single-pulse injection of 2% CO/He (30 sccm, 5 s).
dPt dispersion (*D*Pt) calculated using CO chemisorption and ICP-OES data according to *D*Pt (%) = *X*M *N*s / *N*T × 100, assuming a Pt/CO stoichiometry (*X*M) of 1:1. *N*T is the total number of Pt atoms per unit weight and *N*s is the number of exposed Pt atoms.

**
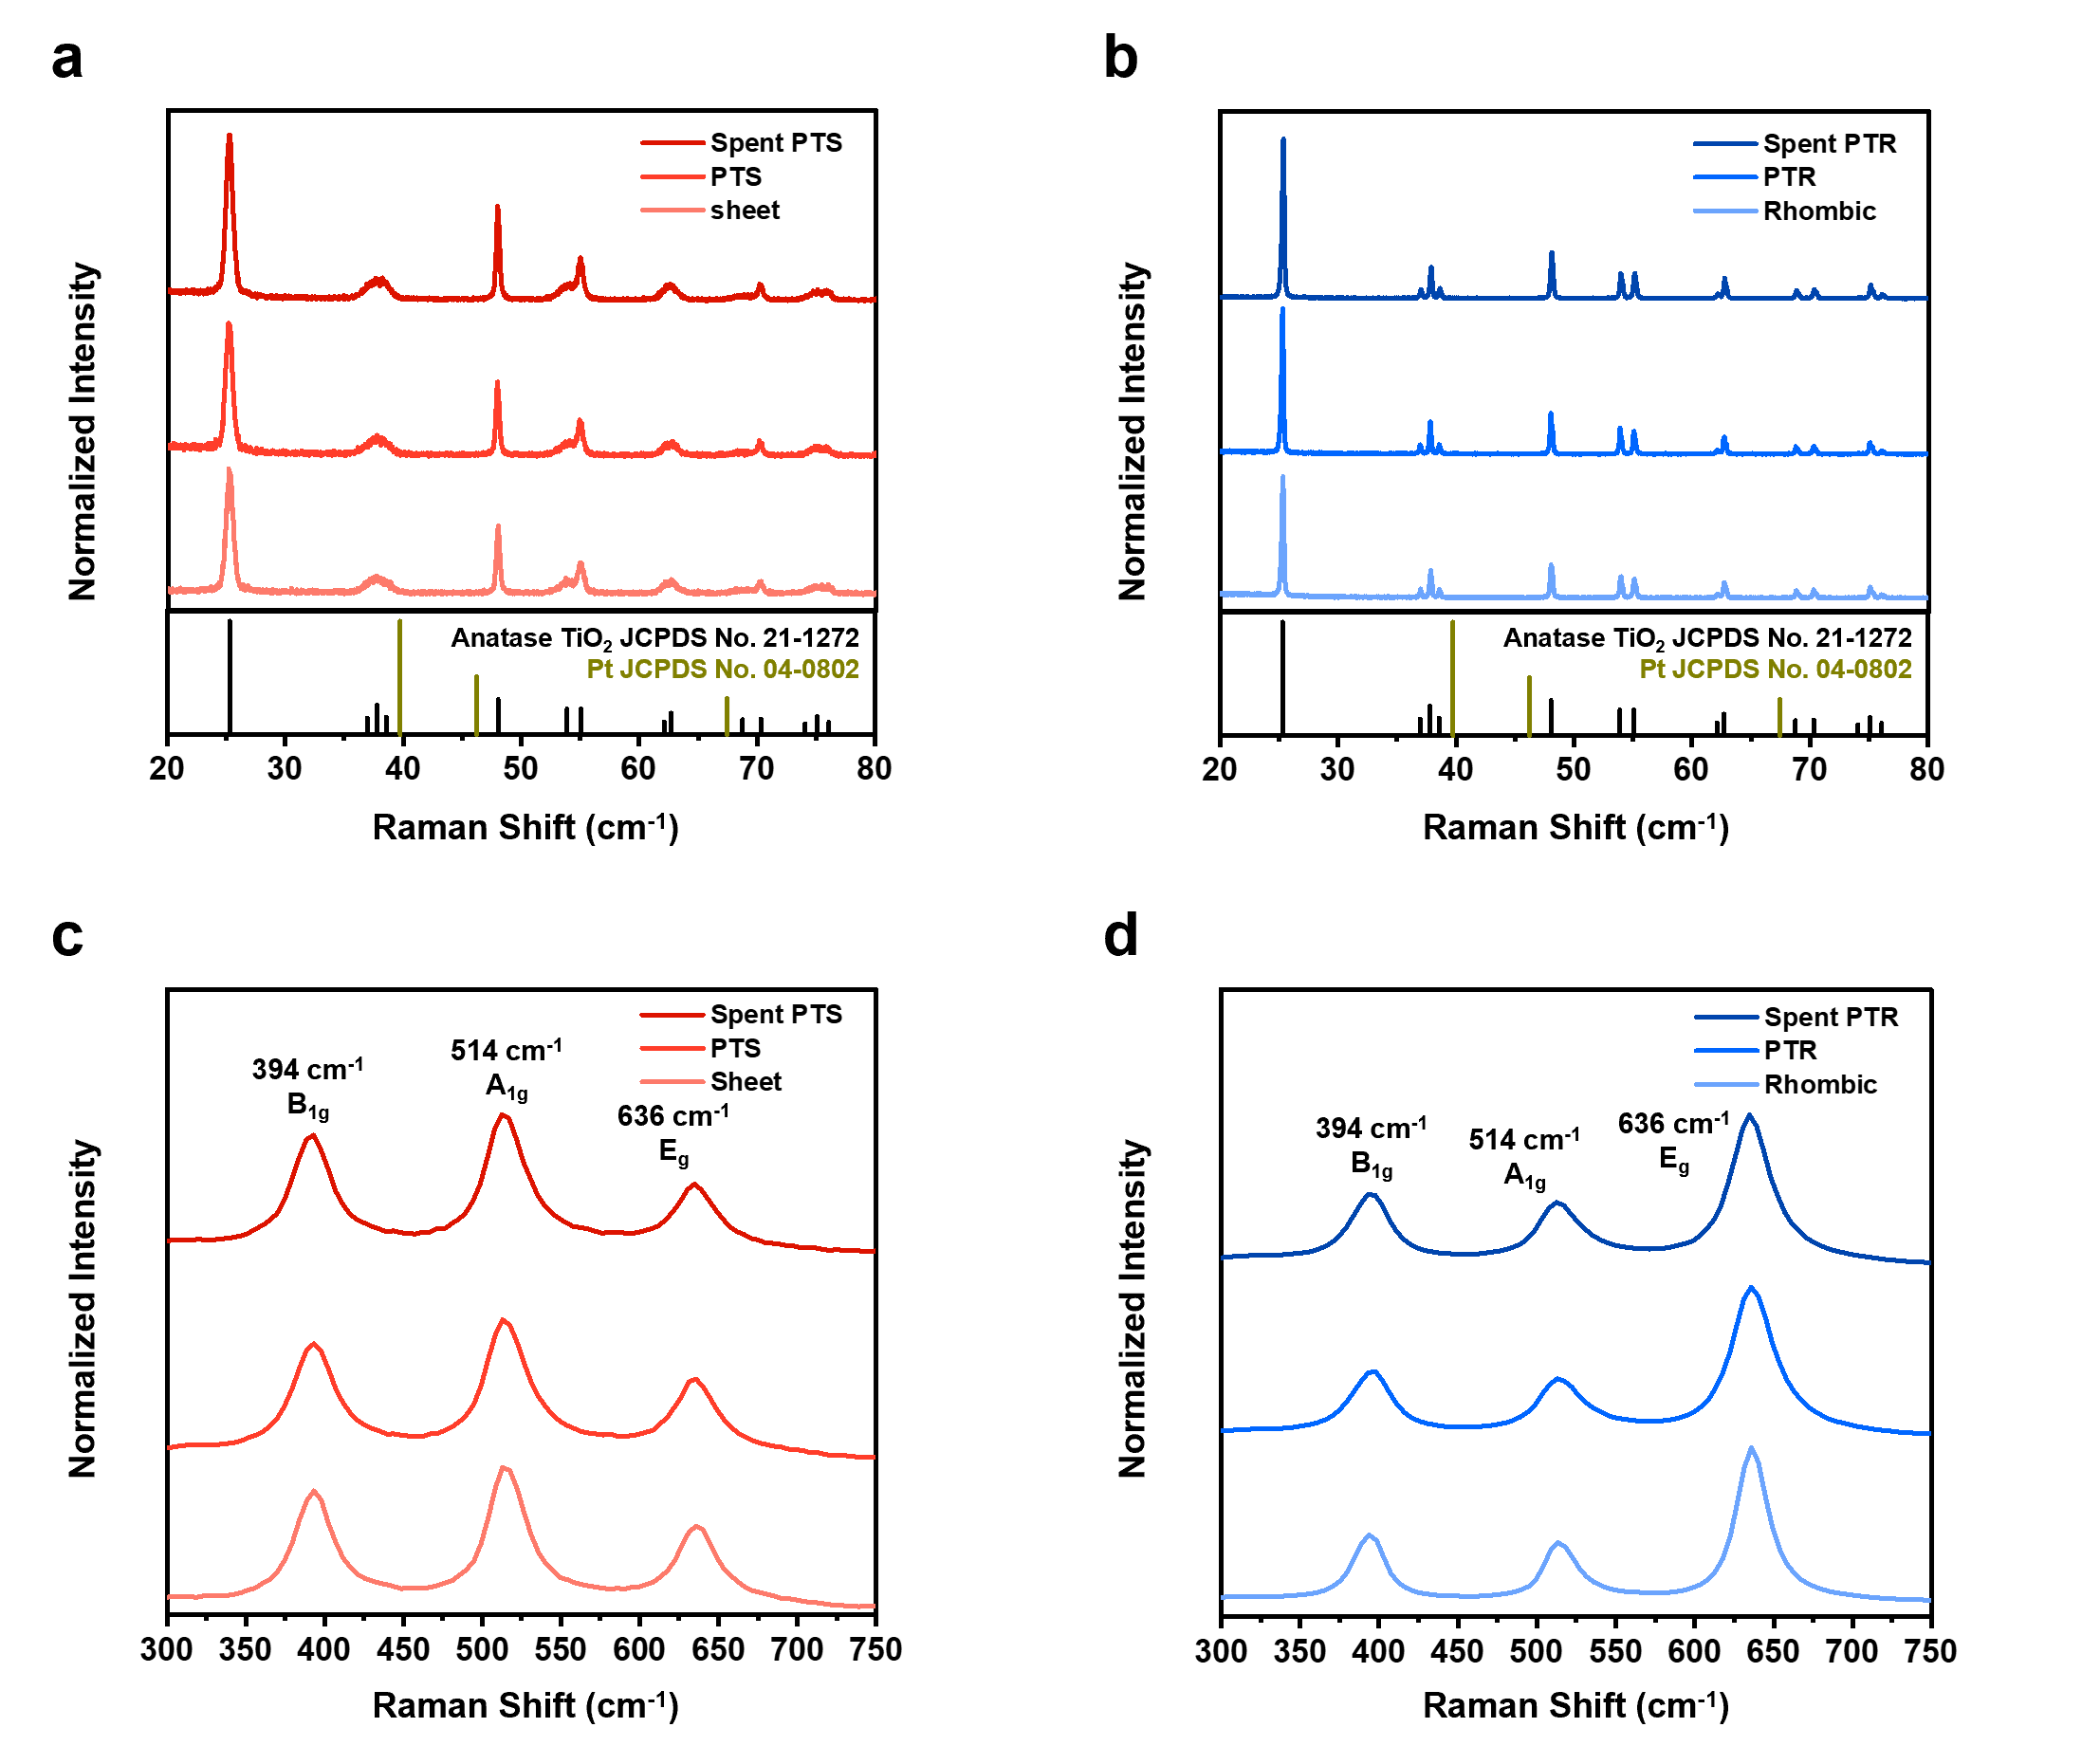
**

**Supplementary Figure 3.** (a–b) XRD patterns and (c–d) Raman spectra of TiO2 supports and Pt/TiO2 catalysts before and after CO oxidation. (a, c) Sheet-shaped TiO2 with predominantly exposed (001) facets, fresh PTS, and spent PTS; (b, d) Rhombic TiO2 with predominantly exposed (101) facets, fresh PTR, and spent PTR. Spent catalysts were obtained after catalytic treatment under 1% CO and 1% O2/Ar flow (50 mL·min⁻¹) at 300 °C for 2 h.

**
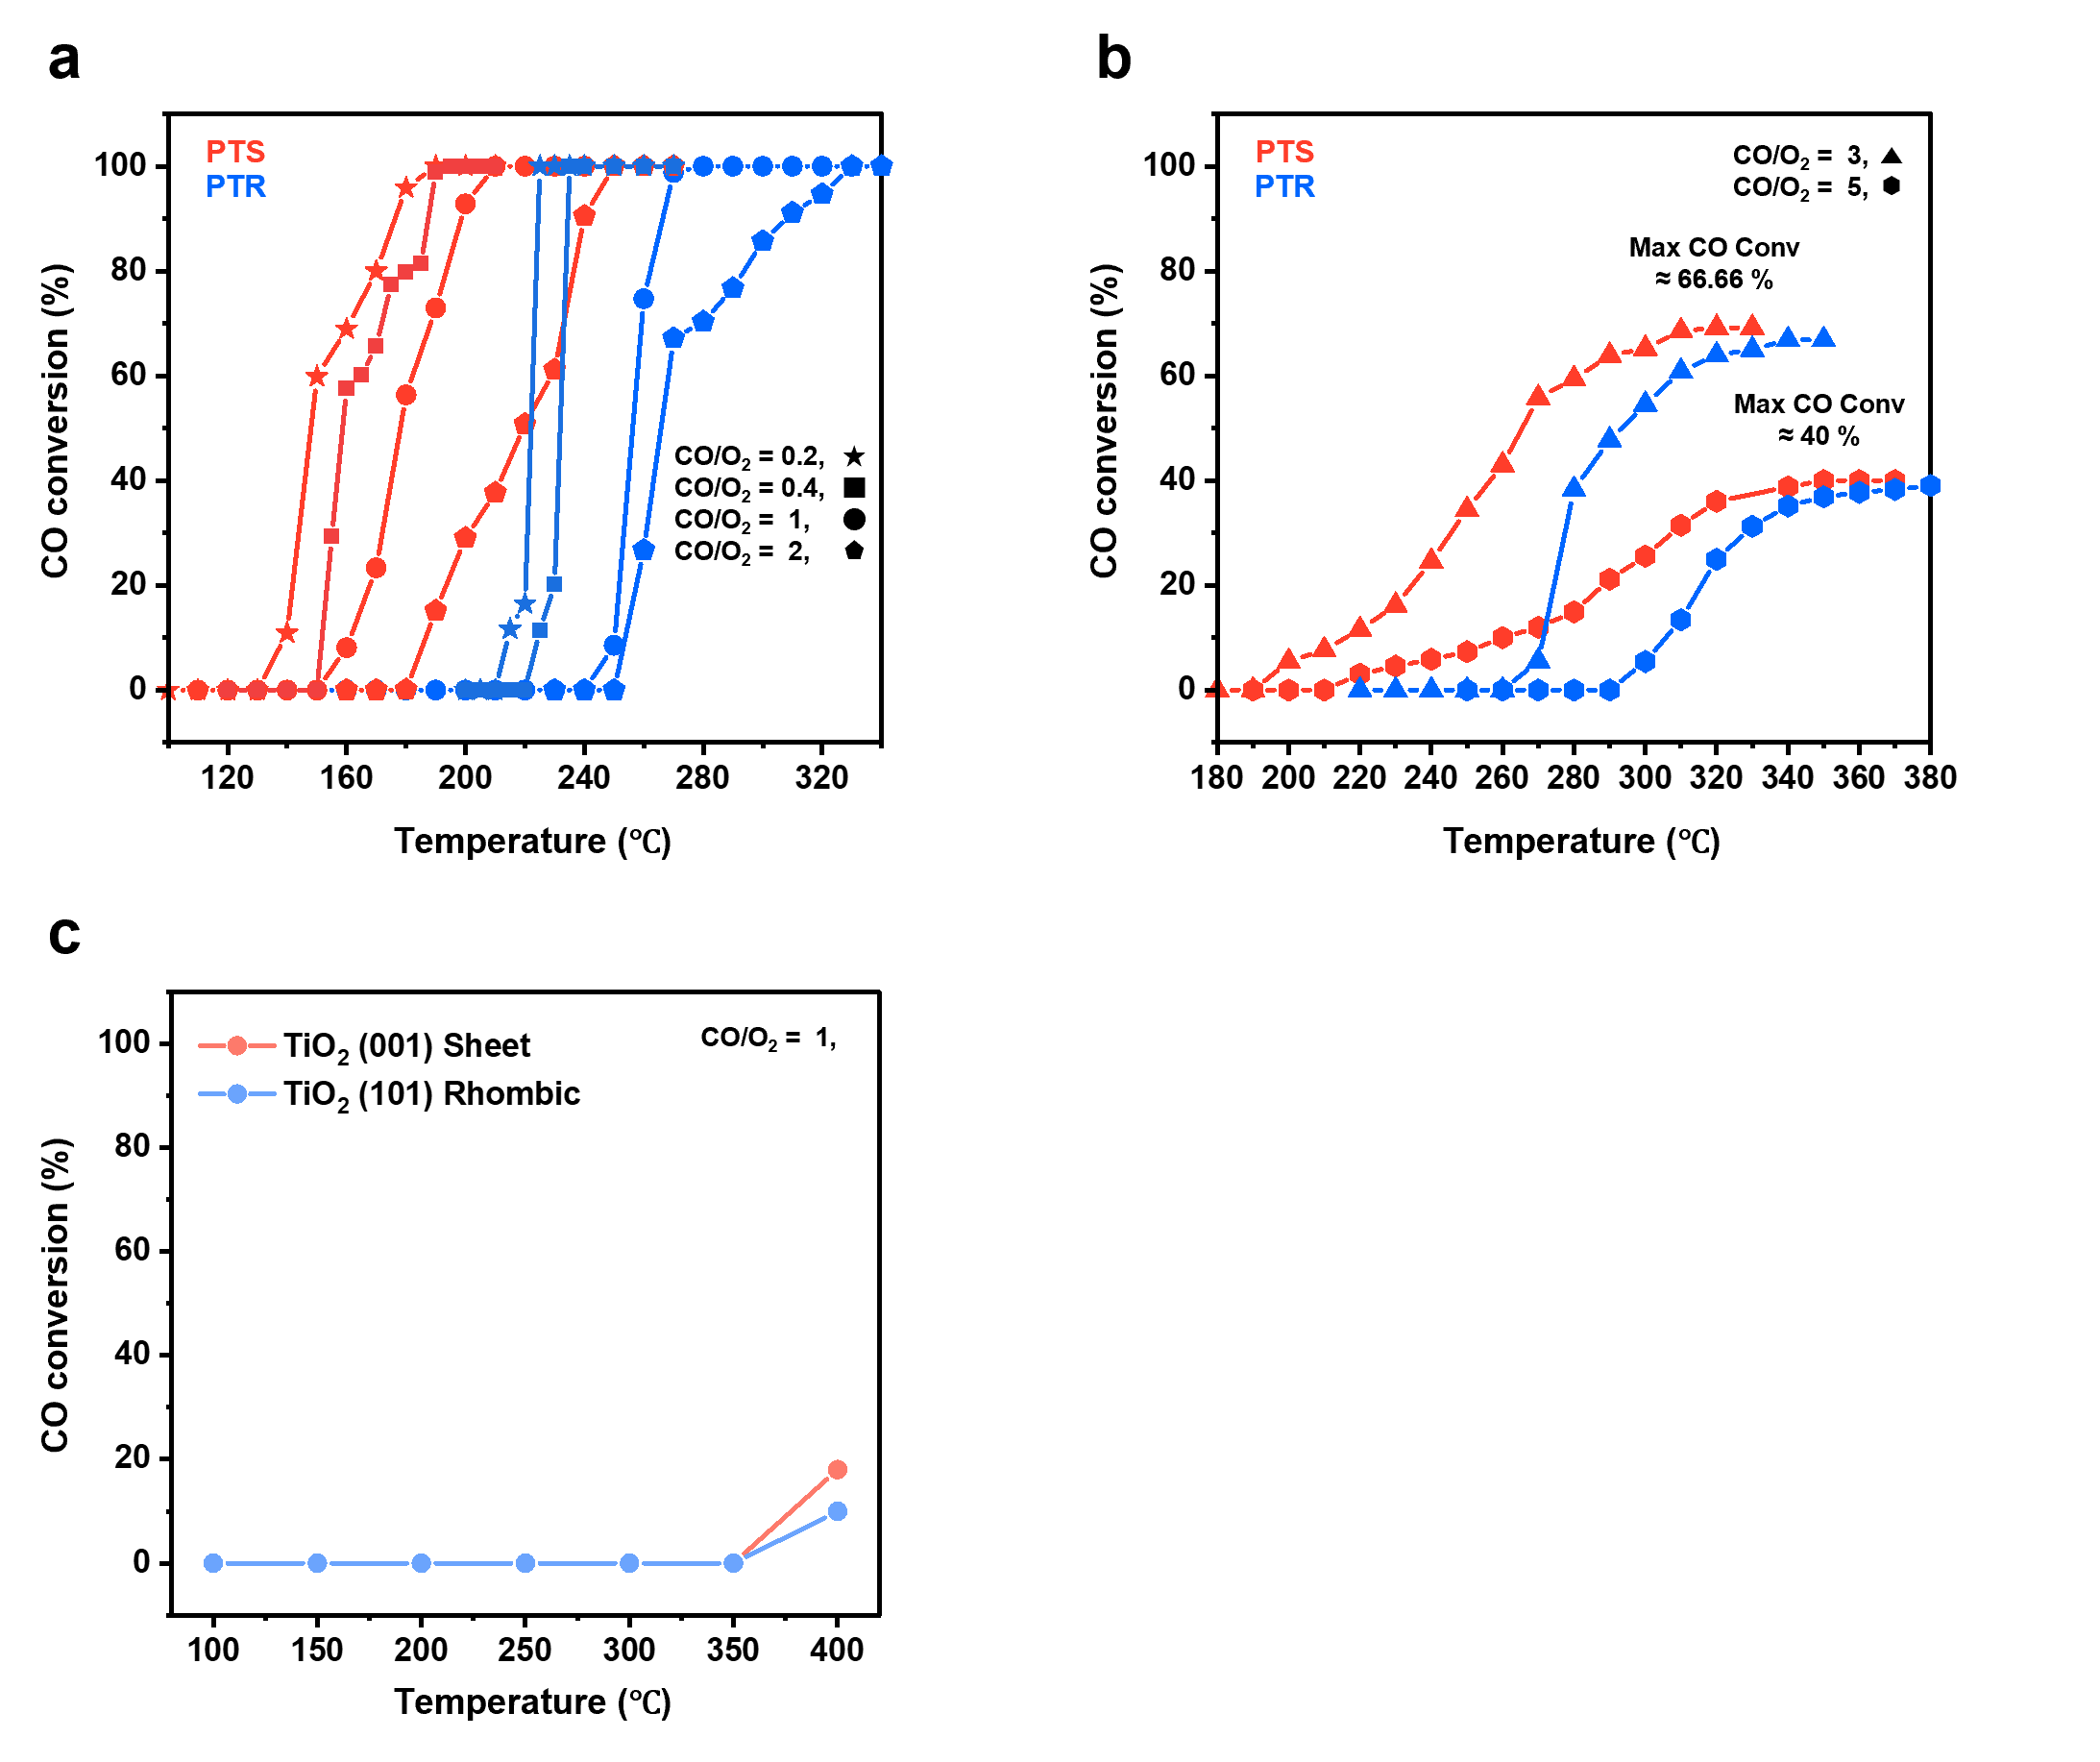
**

**Supplementary Figure 4.** Temperature-dependent CO conversion profiles of PTS and PTR catalysts under varying CO/O2 ratios. (a) Conversion curves under O2-rich to stoichiometric conditions: CO/ O2 = 0.2 (1% CO / 5% O2, ★), 0.4 (1% CO / 2.5% O2, ■), 1 (1% CO / 1% O2, ●), and 2 (1% CO / 0.5% O2, ⬟). (b) Conversion curves under CO-rich conditions: CO/O2 = 3 (3% CO / 1% O2, ▲) and 5 (5% CO / 1% O2, ⬢). (c) CO conversion curves of pristine TiO2 under stoichiometric conditions (CO/O2 = 1). The total gas flow rate was maintained at 50 mL·min⁻¹ for all measurements.

**
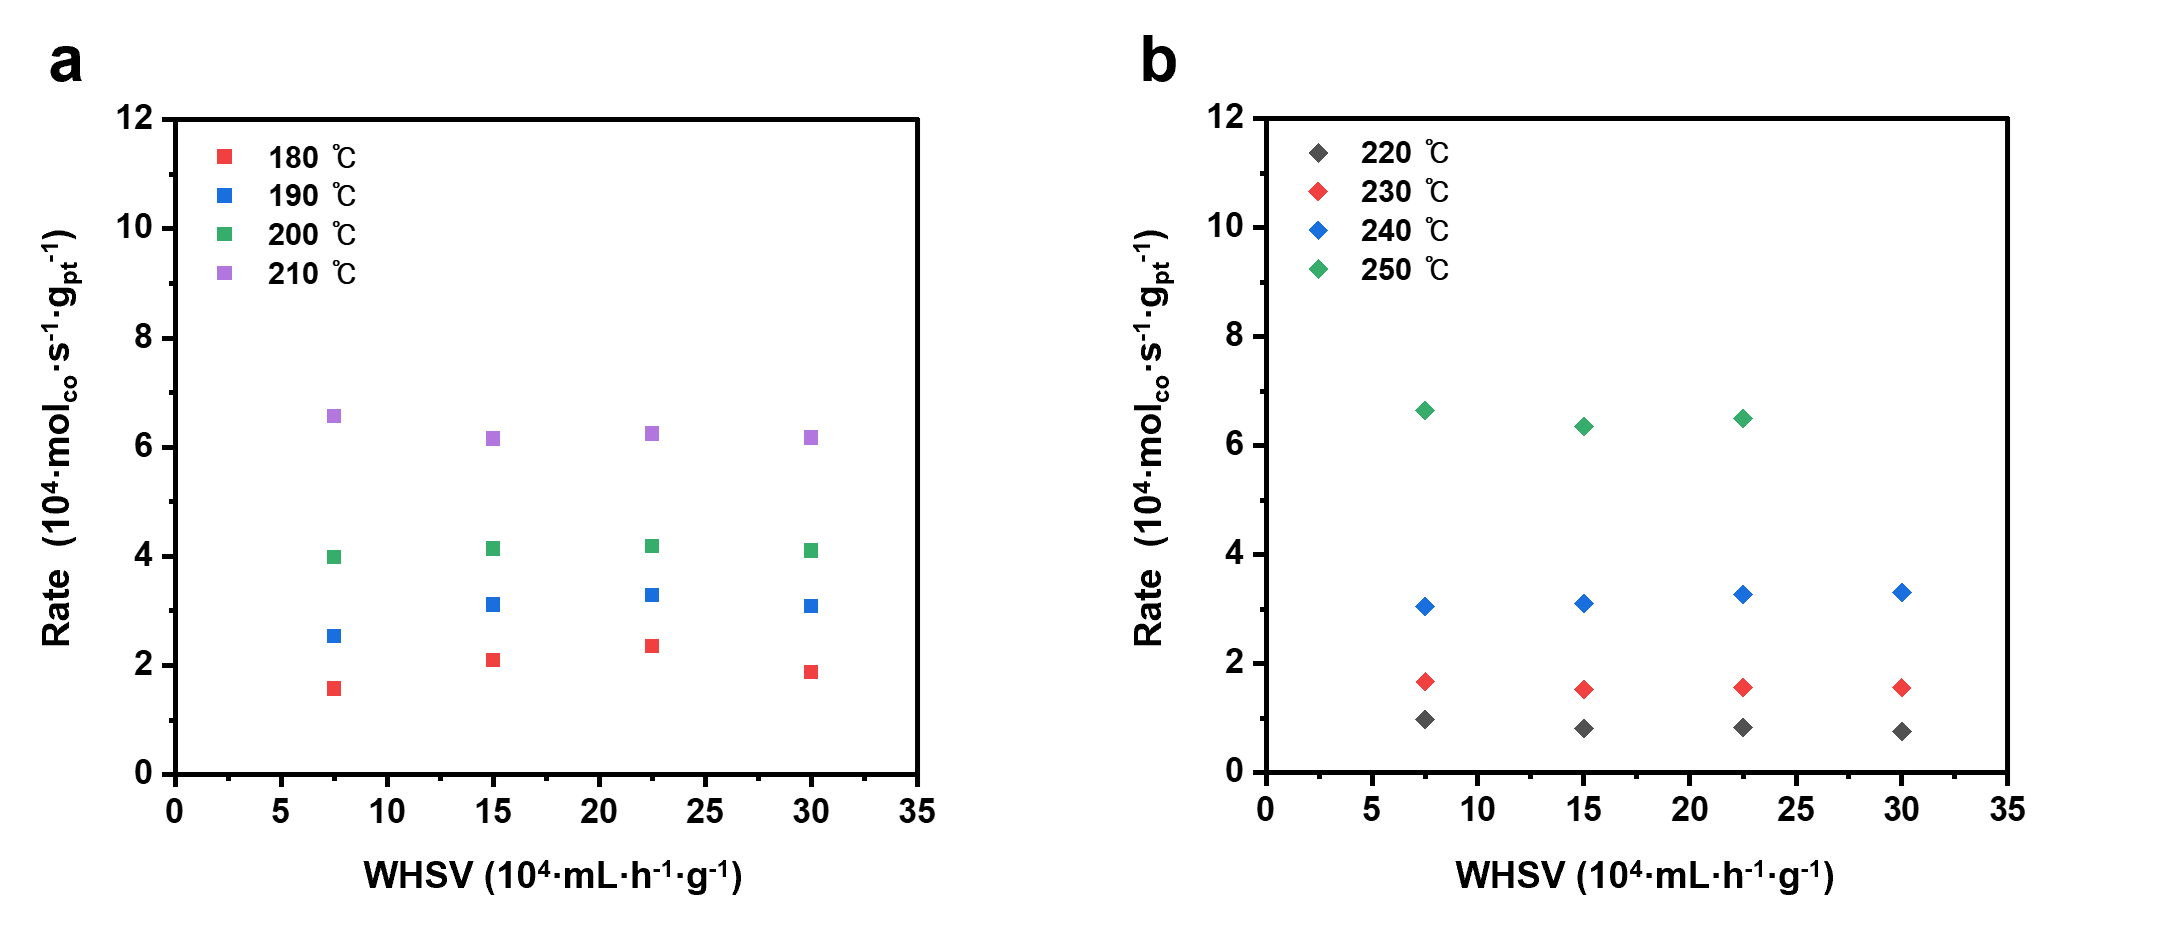
**

**Supplementary Figure 5.** CO oxidation rates over a range of total gas flow rates for (a) PTS and (b) PTR catalysts. The constant reaction rates across varying flow rates confirm that the CO oxidation is controlled by surface kinetics rather than mass transfer limitations. The apparent activation energy (*E*a) was calculated under a total flow rate of 100 mL·min⁻¹ with a CO/O2 ratio of 1, specifically within the kinetically relevant regime (15% CO conversion).


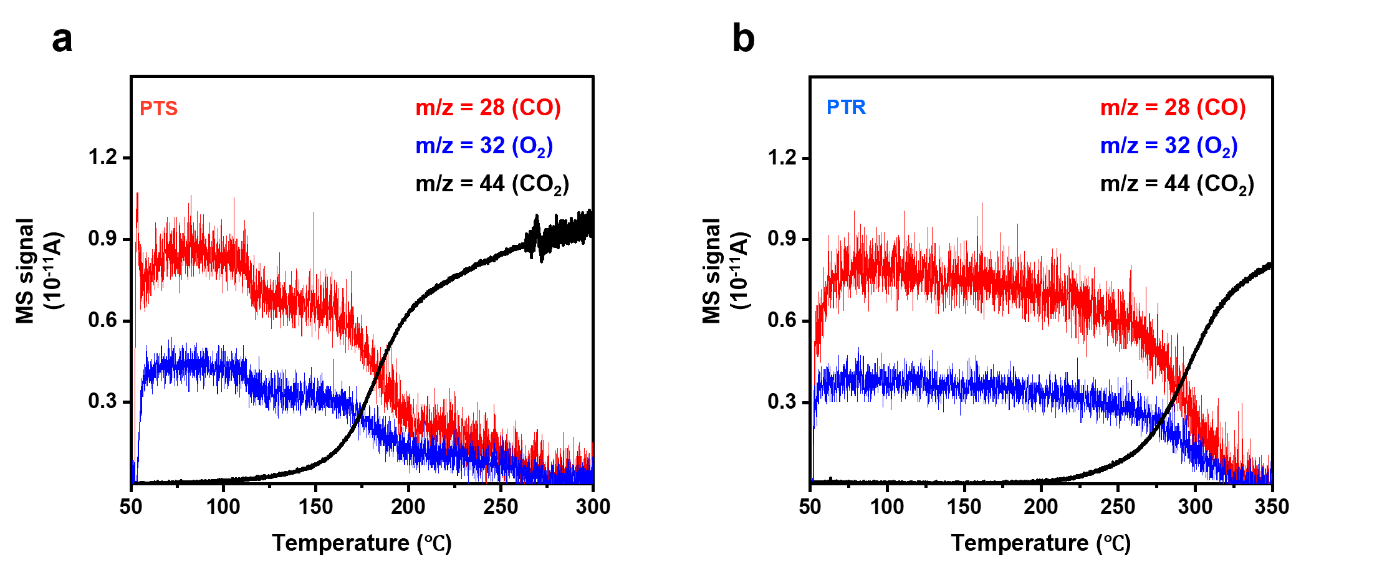


**Supplementary Figure 6.** CO-TPR profiles and corresponding CO2 mass spectrometry (MS) signals for (a) PTS and (b) PTR catalysts. The CO2 MS signal intensities reflect the reducibility and surface oxygen availability of the Pt/TiO2 catalysts under CO-rich conditions, providing insights into the MvK reaction pathway.


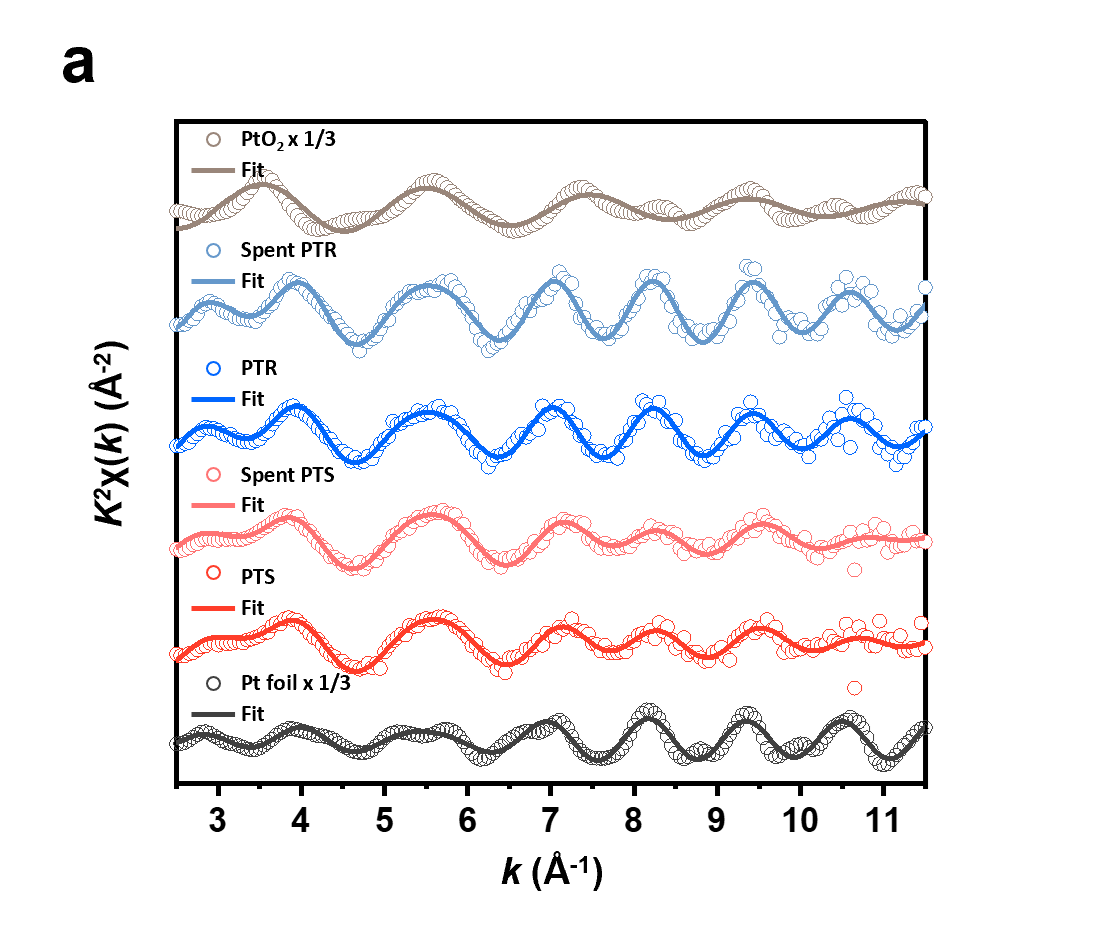


**Supplementary Figure 7.** Pt L3-edge EXAFS *k*²-weighted χ(k) spectra of fresh and spent Pt/TiO2 catalysts, compared with Pt foil and PtO2 reference samples. These data provide insight into the coordination environment and oxidation state of Pt species before and after CO oxidation.

**Supplementary Table 2.** Fitting results of the Pt *L*3-edge EXAFS spectra for fresh and spent Pt/TiO2 catalysts under different CO/O2 ratios (0.2, 1, and 5), compared with Pt foil and PtO2 references.

| Catalysts | shell | CN | d (Å) | σ2 | *E*0 shift | R factor |
| --- | --- | --- | --- | --- | --- | --- |
| Pt foil | Pt−Pt | 12.0 | 2.762 | 0.004 | 7.13 | 0.0095 |
| PtO2 | Pt−O | 6.0 | 2.012 | 0.004 | 7.29 | 0.0022 |
| Fresh PTS | Pt−Pt | 6.4 | 2.713 | 0.010 | 5.56 | 0.0123 |
| Pt−O | 1.6 | 1.970 | 0.005 |
| Spent PTS,  O2-rich (CO/O2=0.2) | Pt−Pt | 7.2 | 2.713 | 0.014 | 6.36 | 0.0102 |
| Pt−O | 2.1 | 1.990 | 0.004 |
| Spent PTS (CO/O2=1) | Pt−Pt | 7.7 | 2.694 | 0.012 | 2.89 | 0.0130 |
| Pt−O | 1.5 | 1.965 | 0.002 |
| Spent PTS,  CO-rich (CO/O2=5) | Pt−Pt | 8.8 | 2.700 | 0.010 | 3.46 | 0.0198 |
| Pt−O | 1.6 | 2.003 | 0.020 |
| Fresh PTR | Pt−Pt | 8.6 | 2.735 | 0.009 | 5.71 | 0.0080 |
| Pt−O | 1.2 | 1.980 | 0.011 |
| Spent PTR,  O2-rich (CO/O2=0.2) | Pt−Pt | 8.2 | 2.746 | 0.006 | 6.66 | 0.0212 |
| Pt−O | 1.0 | 1.990 | 0.005 |
| Spent PTR (CO/O2=1) | Pt−Pt | 8.7 | 2.740 | 0.007 | 6.87 | 0.0127 |
| Pt−O | 1.0 | 1.981 | 0.003 |
| Spent PTR,  CO-rich (CO/O2=5) | Pt−Pt | 10.3 | 2.744 | 0.008 | 5.88 | 0.0110 |
| Pt−O | 0.5 | 1.991 | 0.003 |

CN represents the average coordination number around the Pt absorber atom, σ2 is the Debye–Waller factor, *d* is the bond distance, and R-factor indicates the quality of the fit. The amplitude reduction factor (S02) was fixed at 0.77, as determined from Pt foil fitting. EXAFS fitting was performed using *k2*-weighted spectra over the ranges: 2.8(3.0) < *k* < 10.8(11) Å–1 and 1(1.3) < *r* < 3.3(3.5) Å.

**
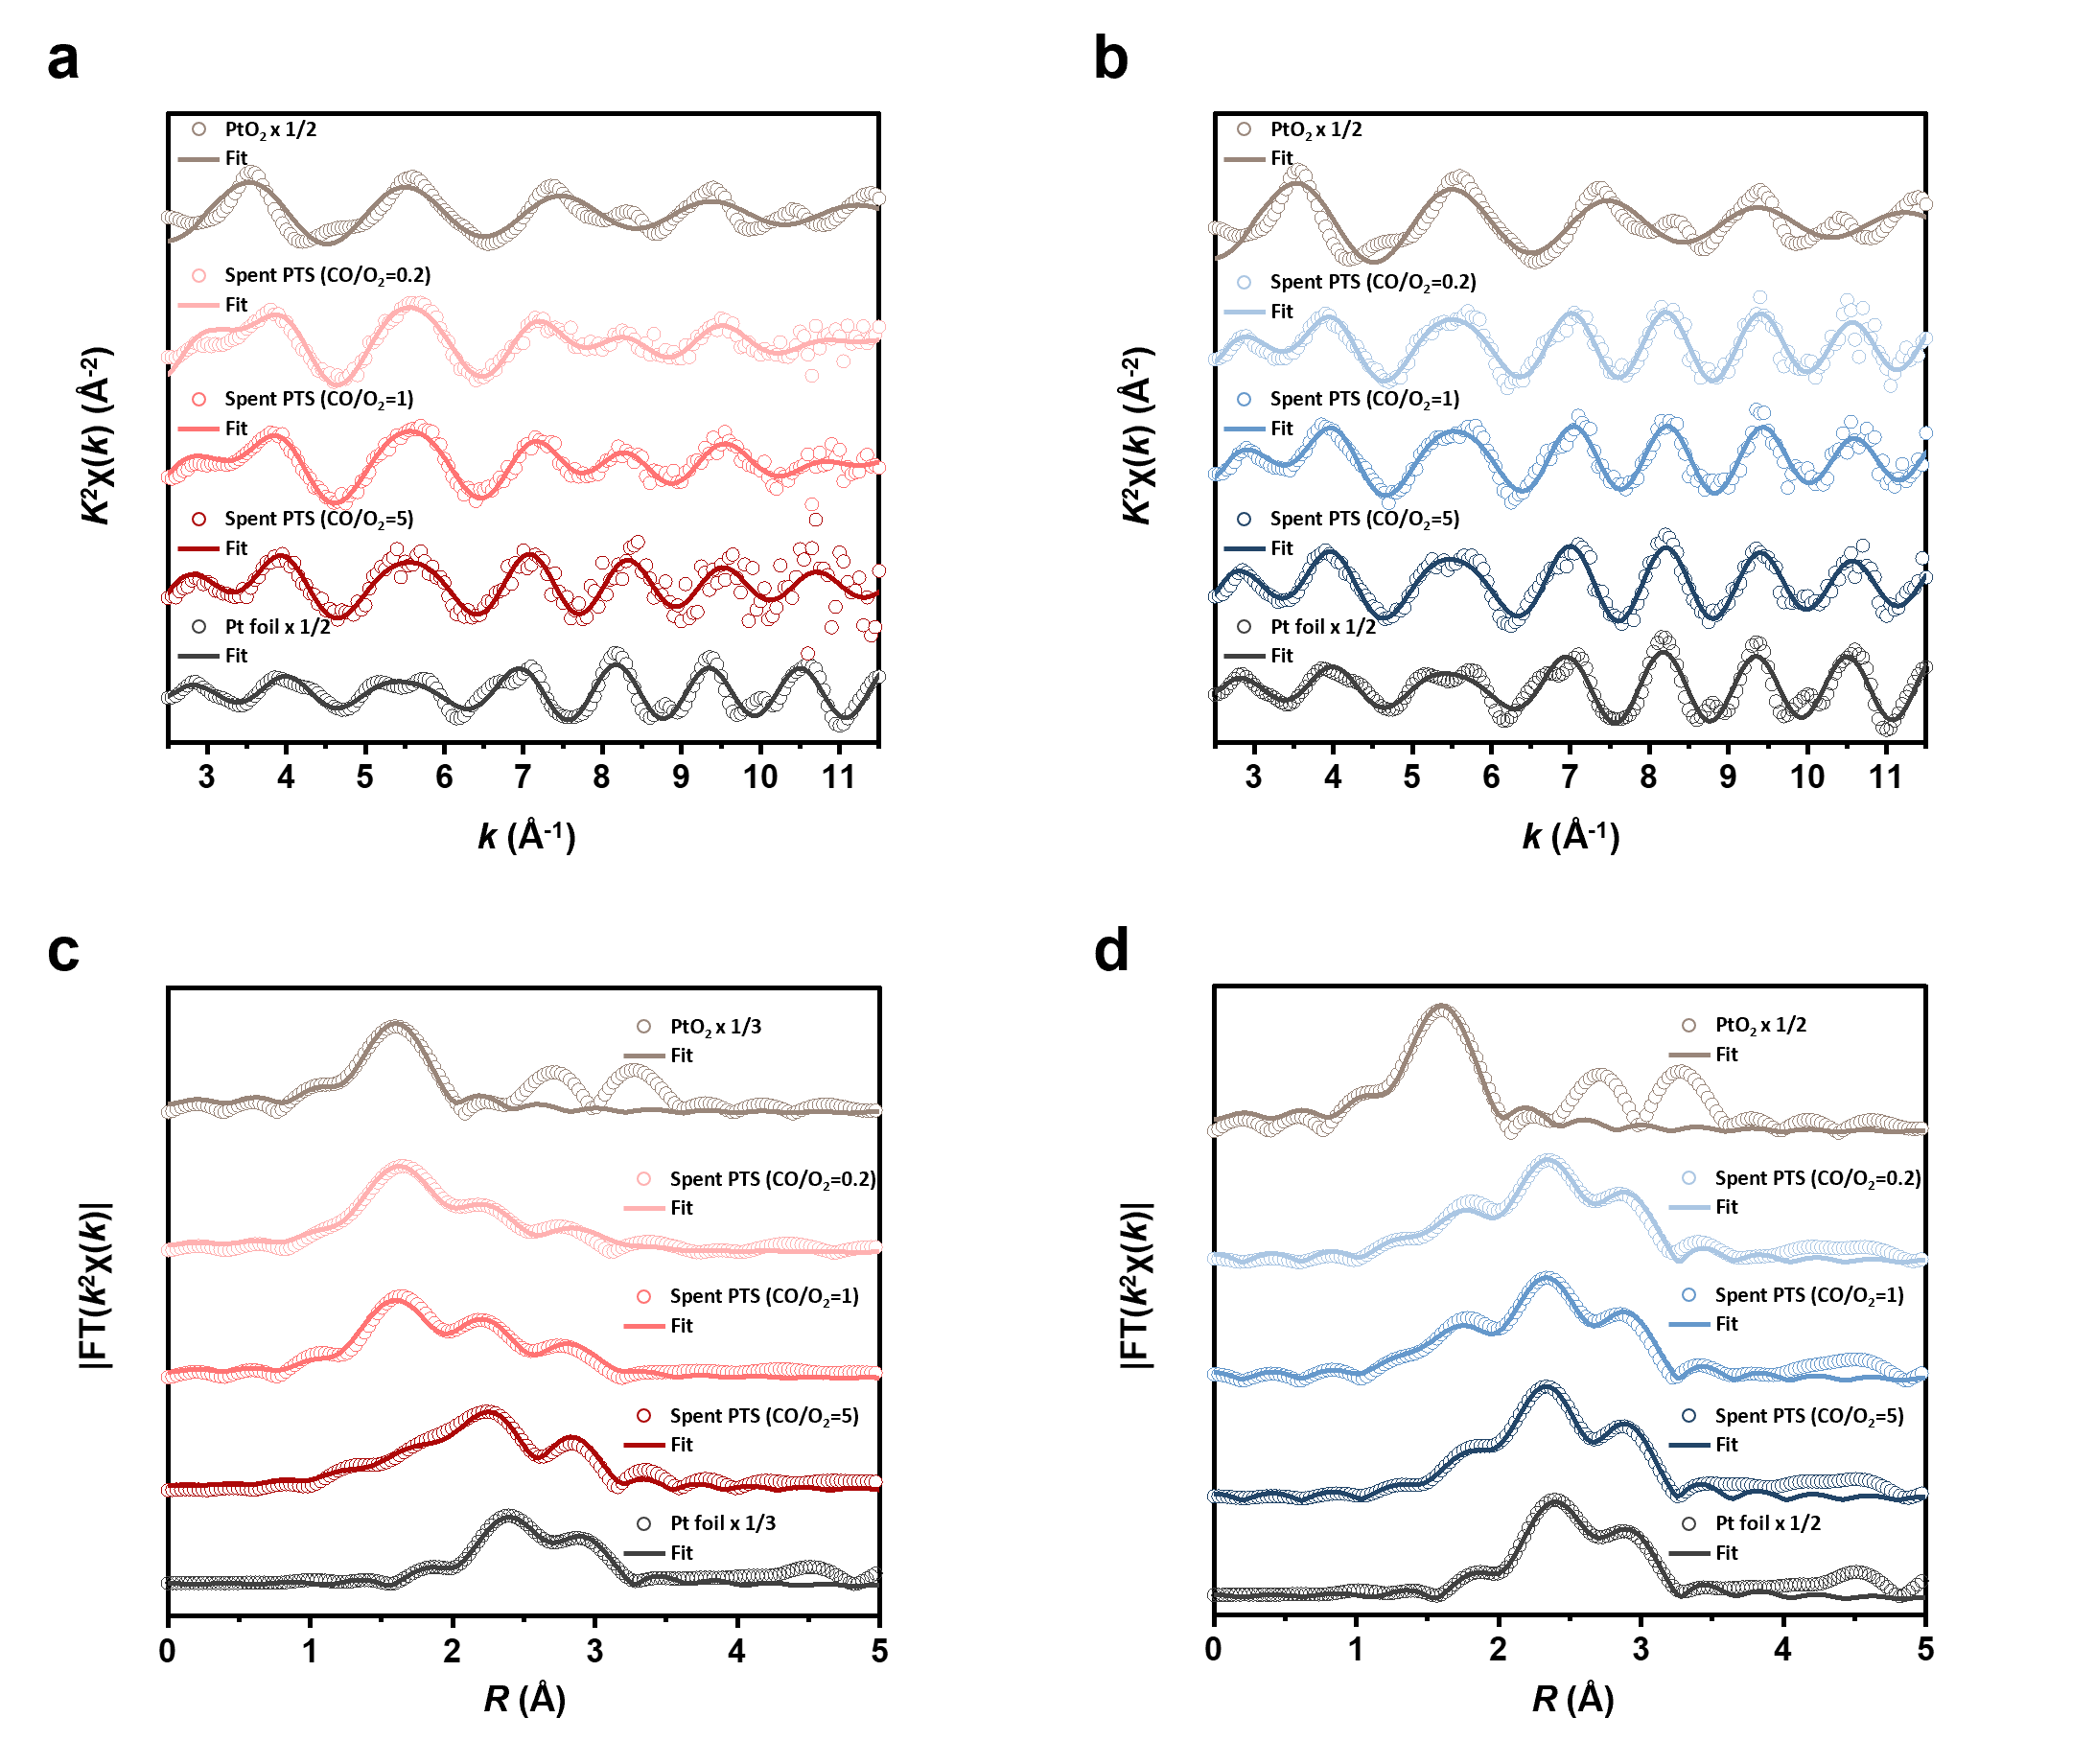

Supplementary Figure 8.** (a, b) *k2*-weighted χ(*k*) functions of Pt *L*3-edge EXAFS spectra for spent Pt/TiO2 catalysts after CO oxidation under different CO/O2 ratios (0.2, 1, and 5). (c, d) Corresponding FT-EXAFS spectra and fitting results, showing the local coordination environment of Pt after catalytic reaction.

**
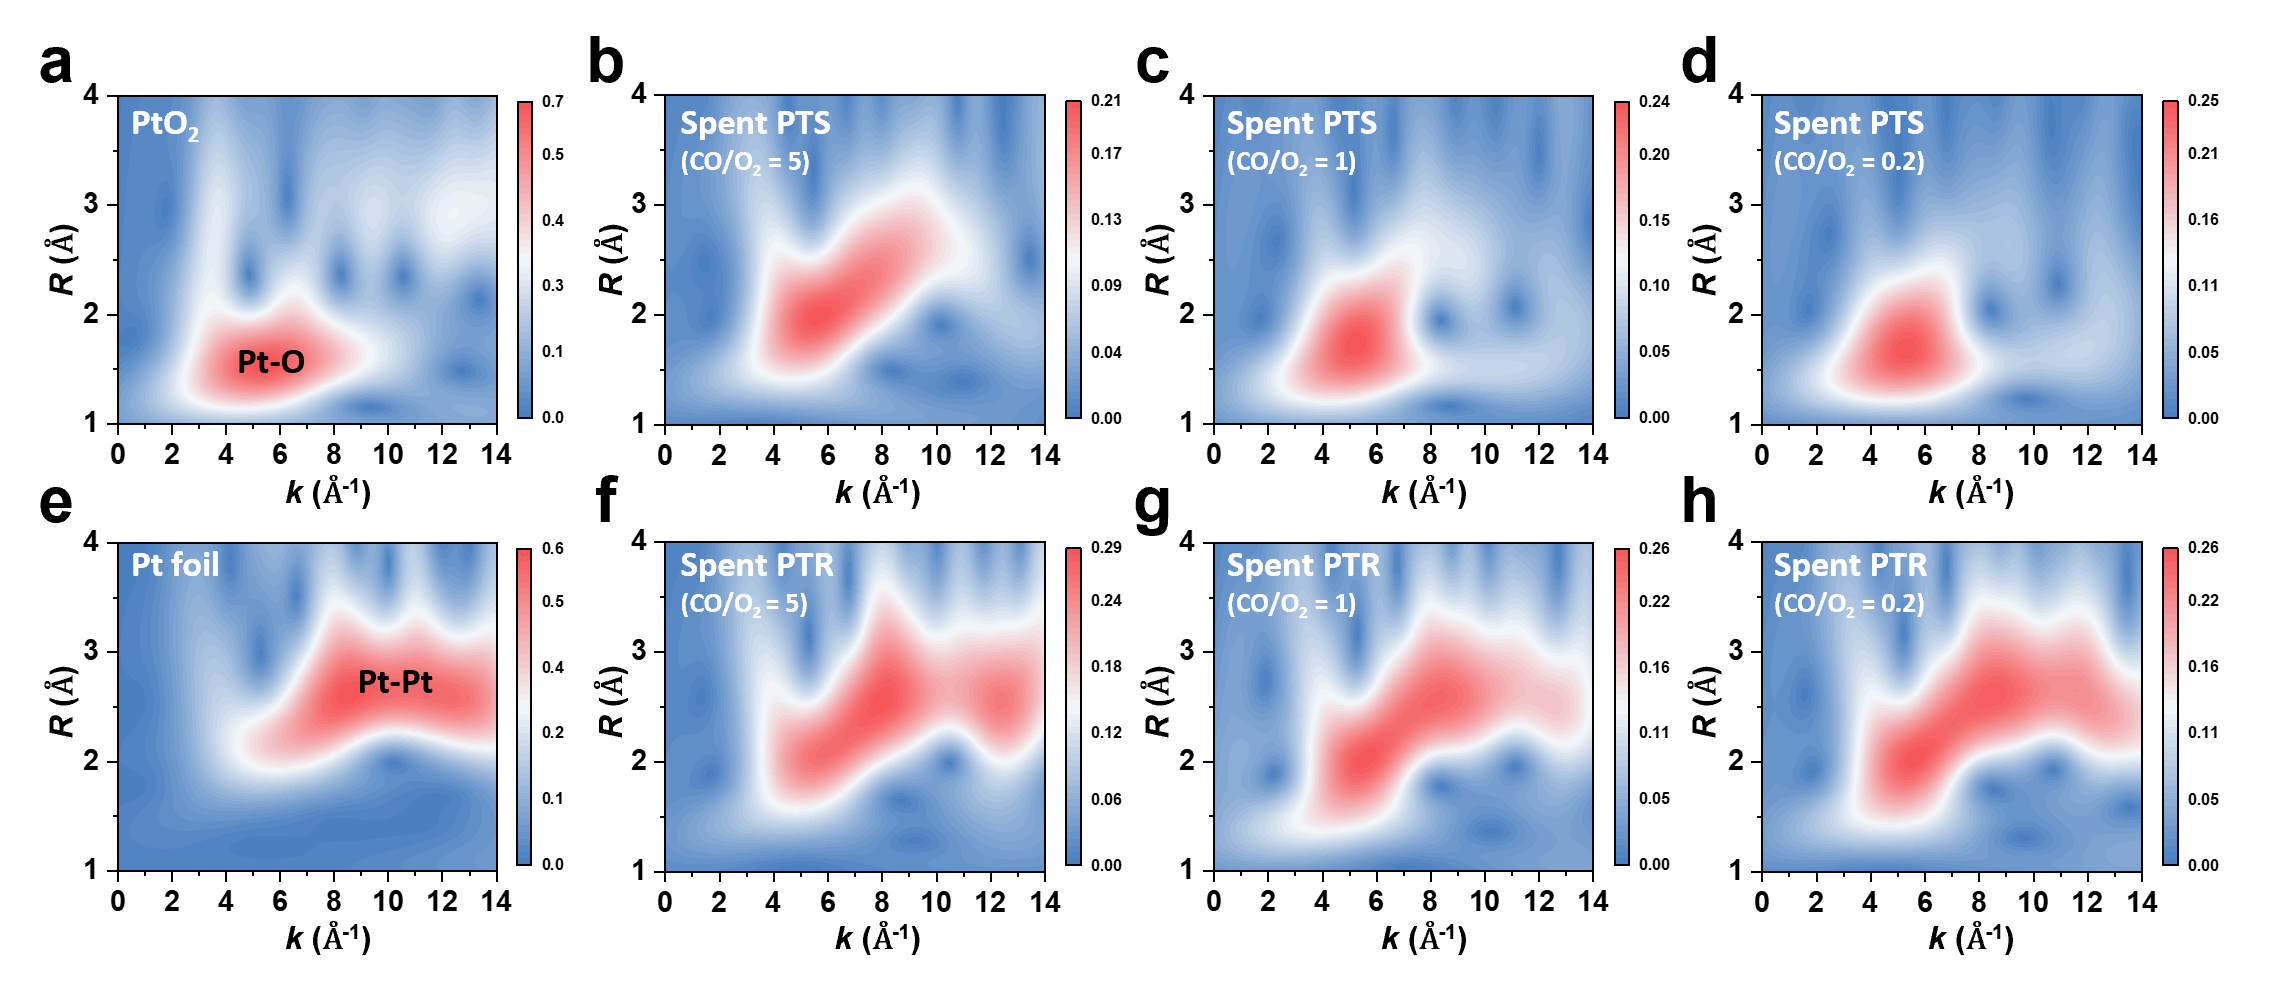
Supplementary Figure 9.** WT contour maps of *k2χ(k)* functions from Pt *L*3-edge EXAFS for spent Pt/TiO2 catalysts after CO oxidation under various CO/O2 ratios, compared with reference materials: (a) PtO2, (b–d) spent PTS at CO/O2 = 5, 1, and 0.2, respectively, (e) Pt foil, and (f–h) spent PTR at CO/O2 = 5, 1, and 0.2, respectively. These maps visualize changes in Pt coordination and bonding environments induced by different reaction conditions.

**
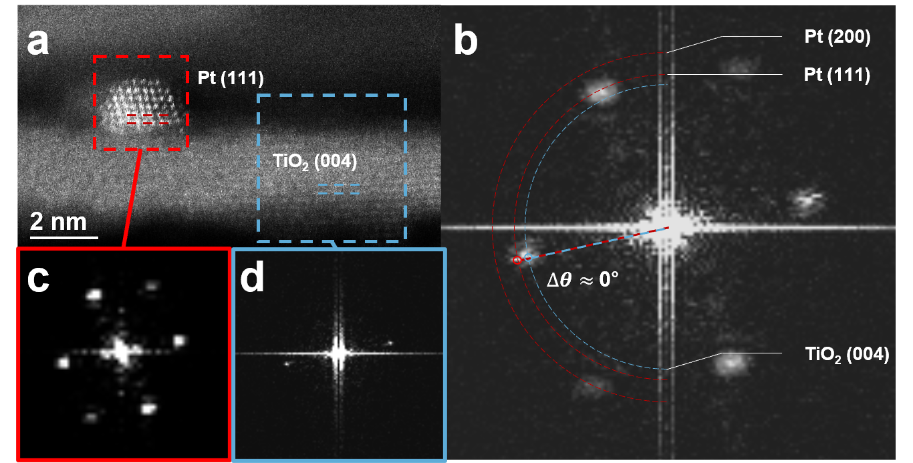
**

**Supplementary Figure 10.** (a) HAADF-STEM image of the spent PTS catalyst after CO oxidation. (b) Corresponding fast Fourier transform (FFT) pattern of the selected region in (a). Insets show magnified FFT patterns for (c) Pt NPs and (d) the TiO2 nanosheet, respectively, indicating lattice alignment and potential epitaxial relationship between Pt and the TiO2 (001) facet.

**
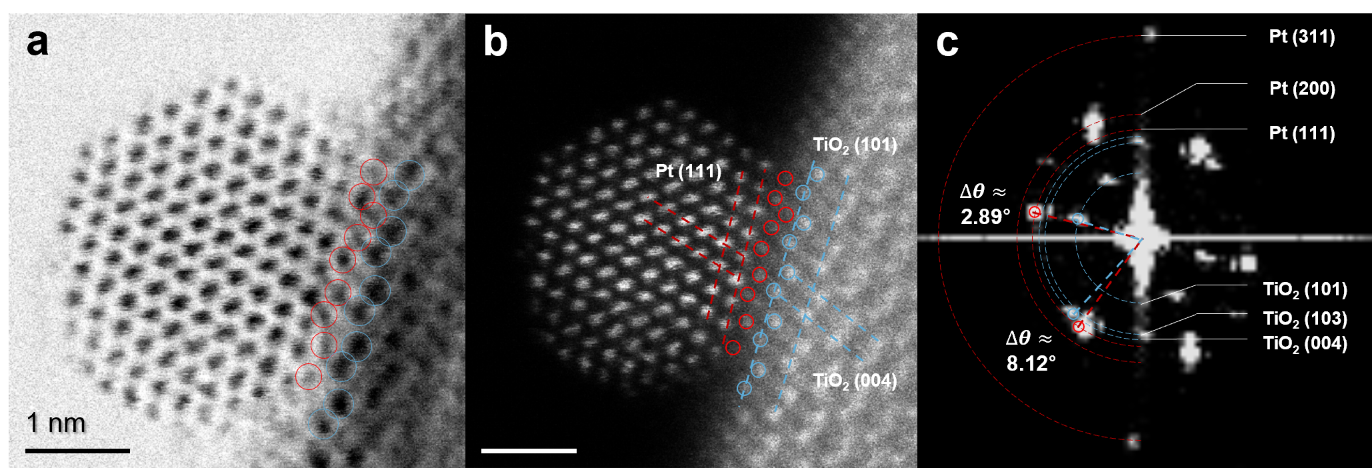
**

**Supplementary Figure 11.** (a) Bright-field and (b) dark-field STEM images of the spent PTR catalyst after CO oxidation. (c) Corresponding FFT pattern of image (b). The positions of Pt and Ti atoms in (b) are indicated by red and blue circles, respectively, based on contrast differences observed in (a), highlighting the interface structure between Pt and the TiO2 (101) facet.

**
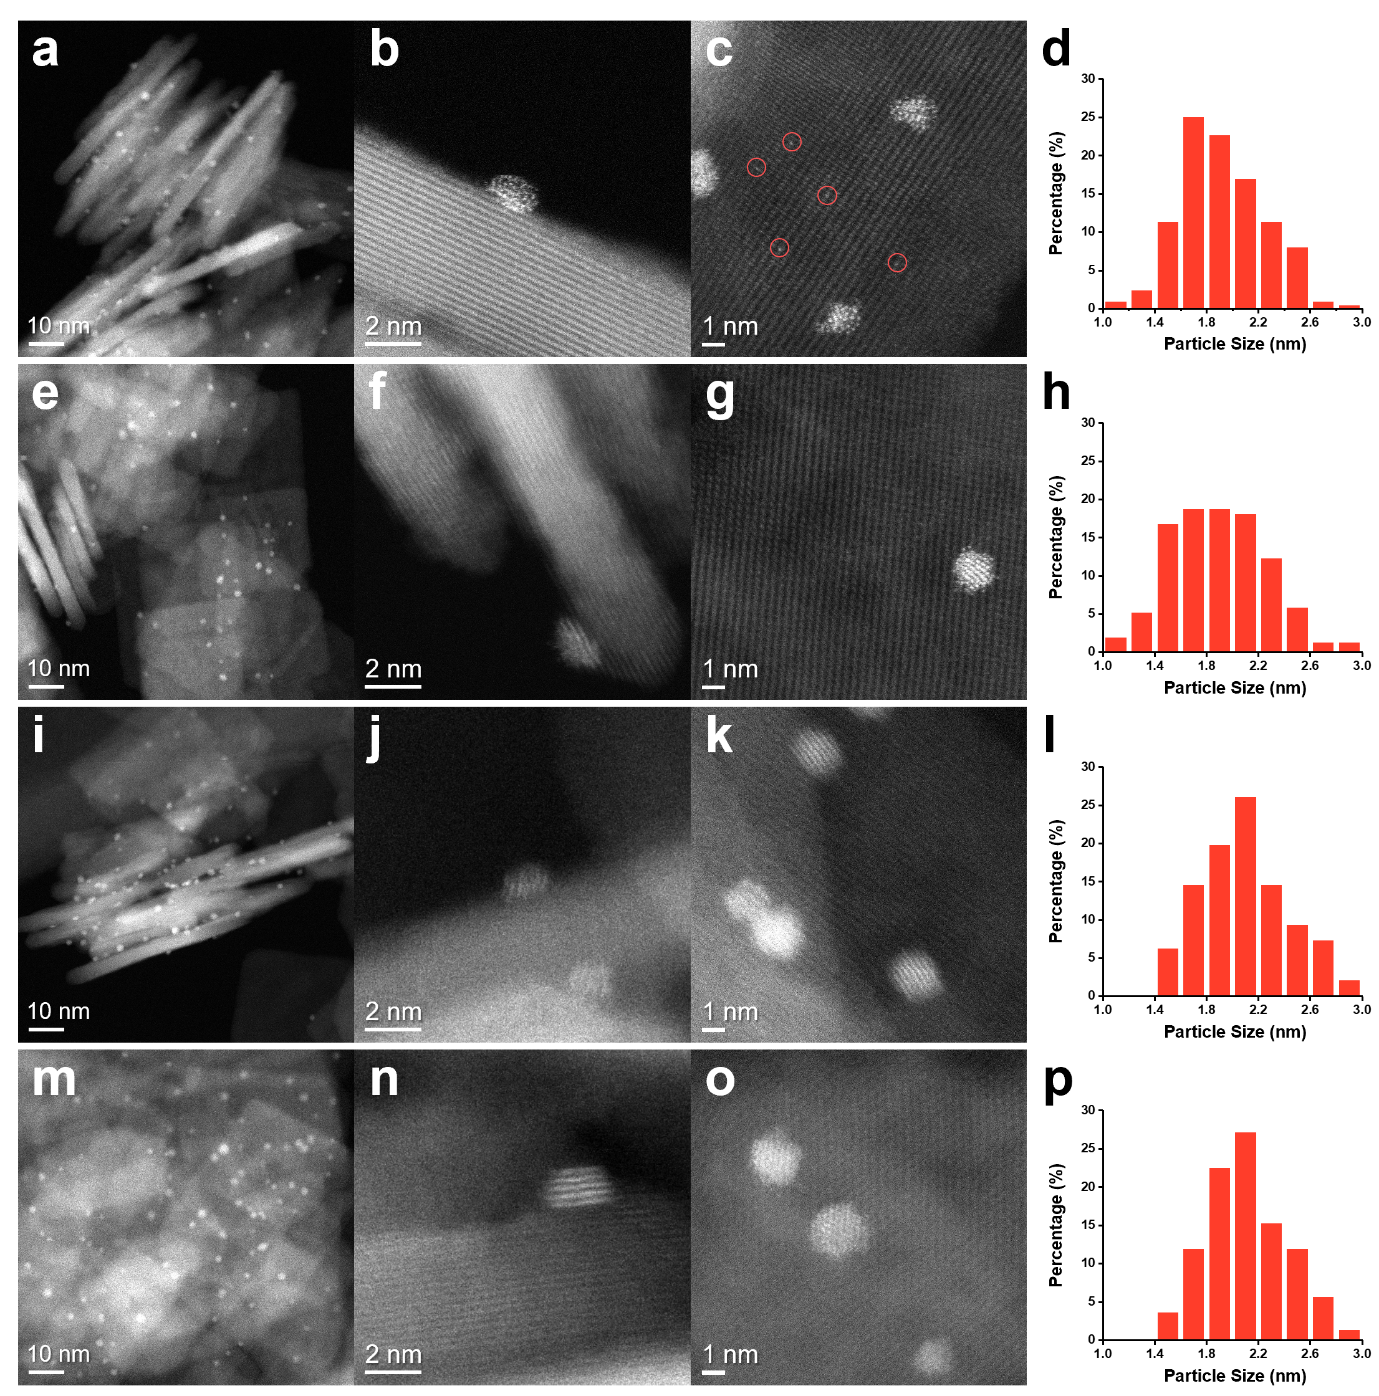
**

**Supplementary Figure 12.** HAADF−STEM images and corresponding Pt particle size distributions of the spent PTS catalyst after CO oxidation under varying CO/O2 ratios: (a–d) CO/O2 = 0.2, (e–h) CO/O2 = 1, (i–l) CO/O2 = 3, and (m–p) CO/O2 = 5. Each set shows representative NP morphology and size histogram, indicating facet-dependent reconstruction behavior of Pt on TiO2 (001).

**
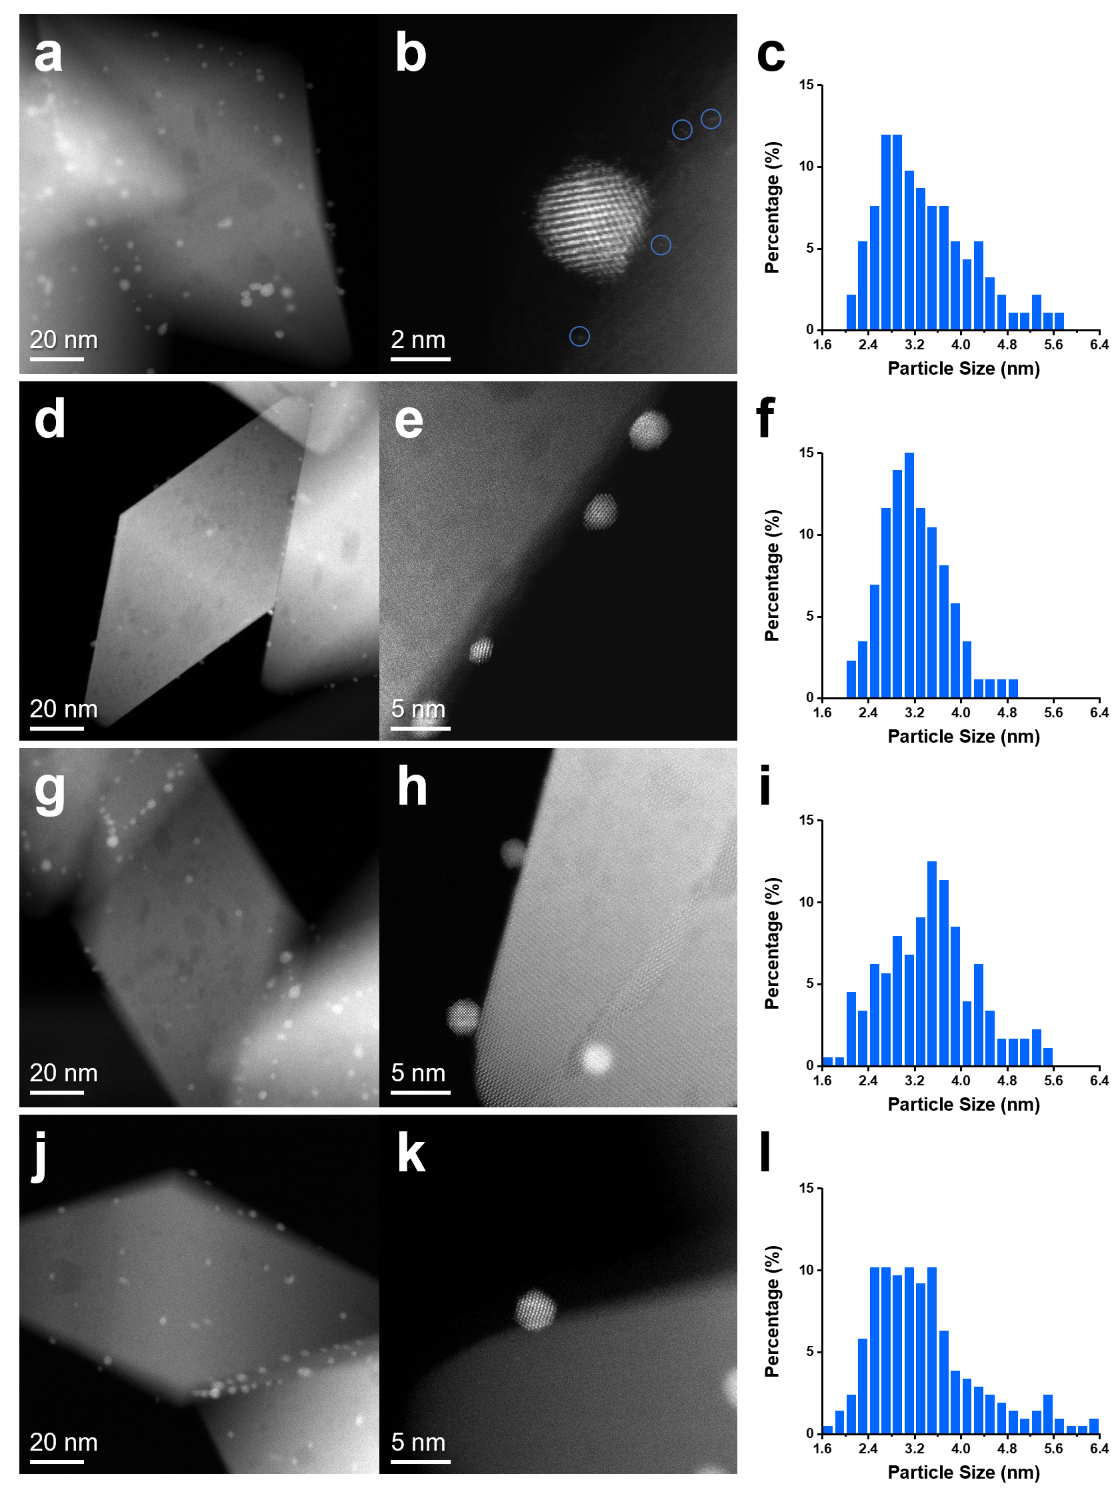
**

**Supplementary Figure 13.** HAADF−STEM images and corresponding Pt particle size distributions of the spent PTR catalyst after CO oxidation under various CO/O2 ratios: (a–c) CO/O2 = 0.2, (d–f) CO/O2 = 1, (g–i) CO/O2 = 3, and (j–l) CO/O2 = 5. Each set shows representative NP morphology and size histogram, indicating facet-dependent reconstruction behavior of Pt on TiO2 (101).

**
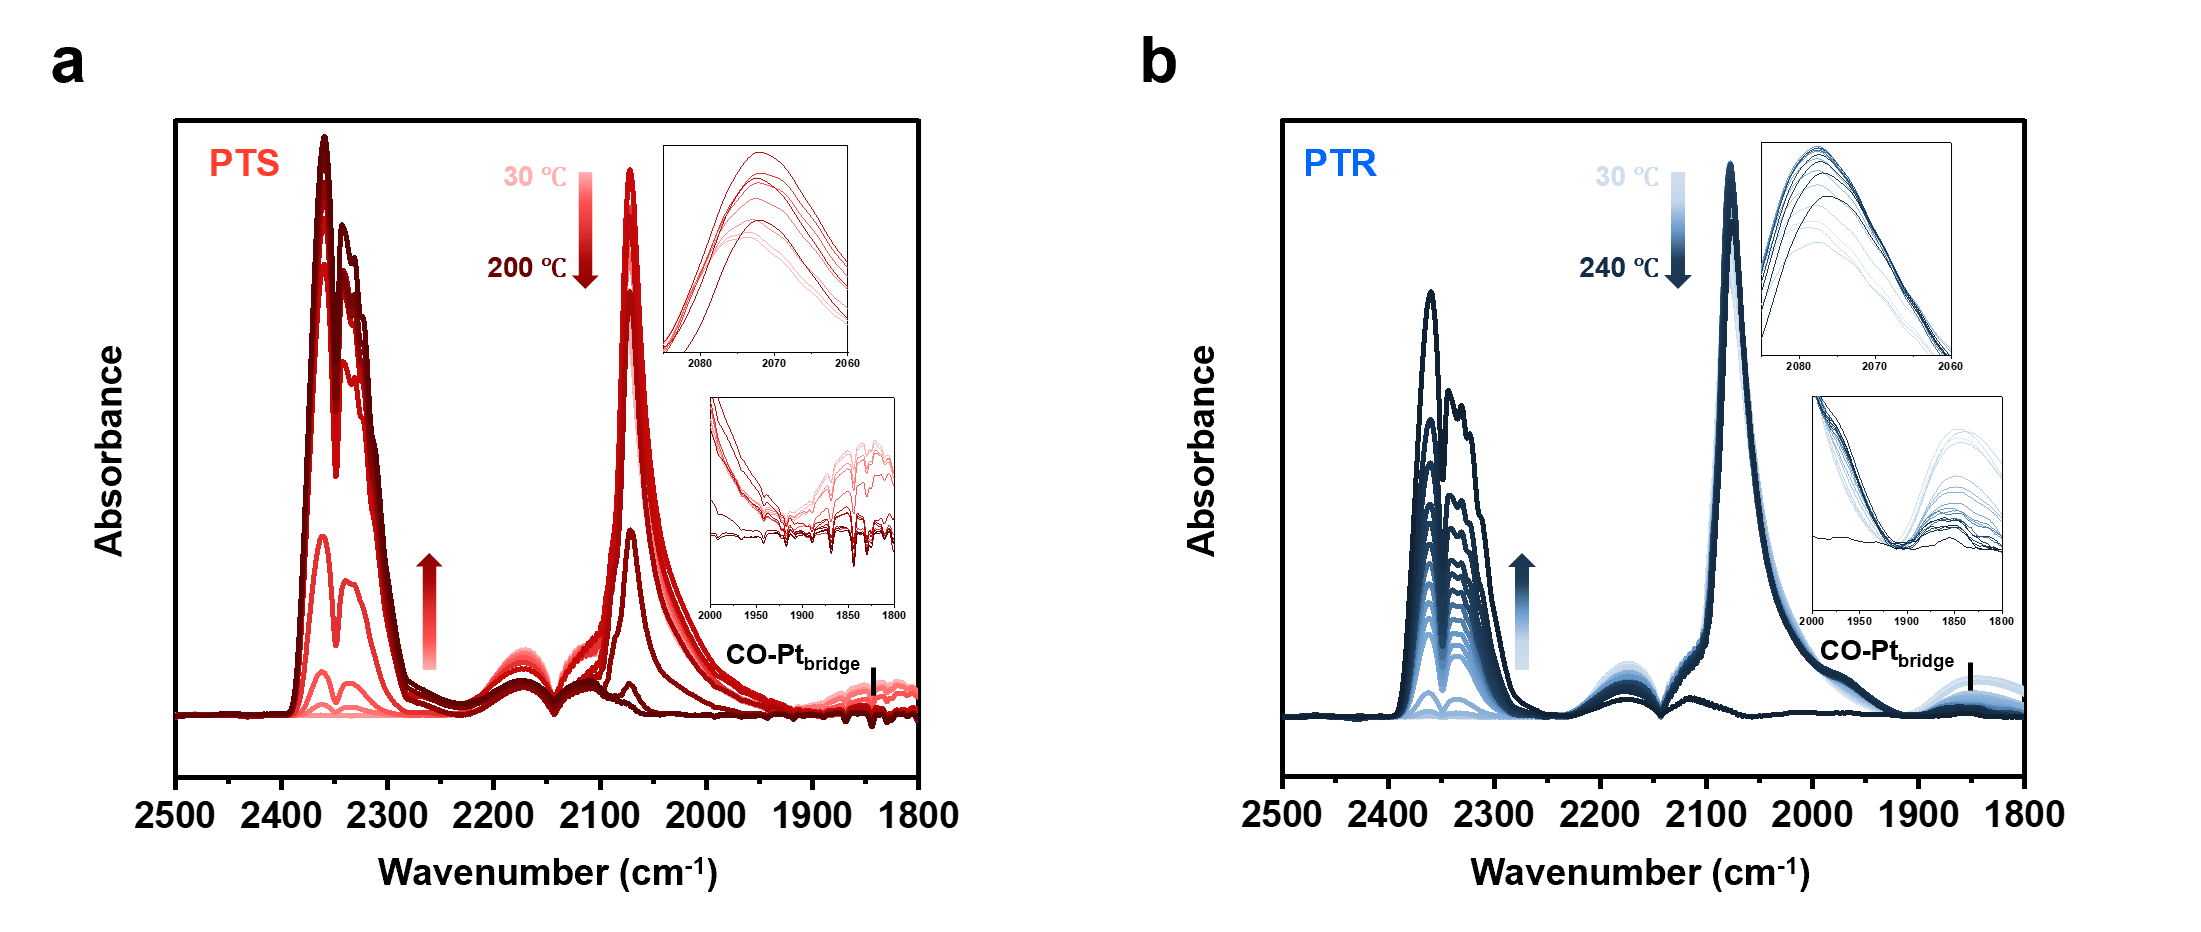
**

**Supplementary Figure 14.** Full *in situ* DRIFTS spectra of (a) PTS and (b) PTR catalysts recorded under CO oxidation conditions (CO/O2 = 1) at various temperatures. The spectra capture the temperature-dependent evolution of surface species, including CO adsorption and CO2 formation.

**
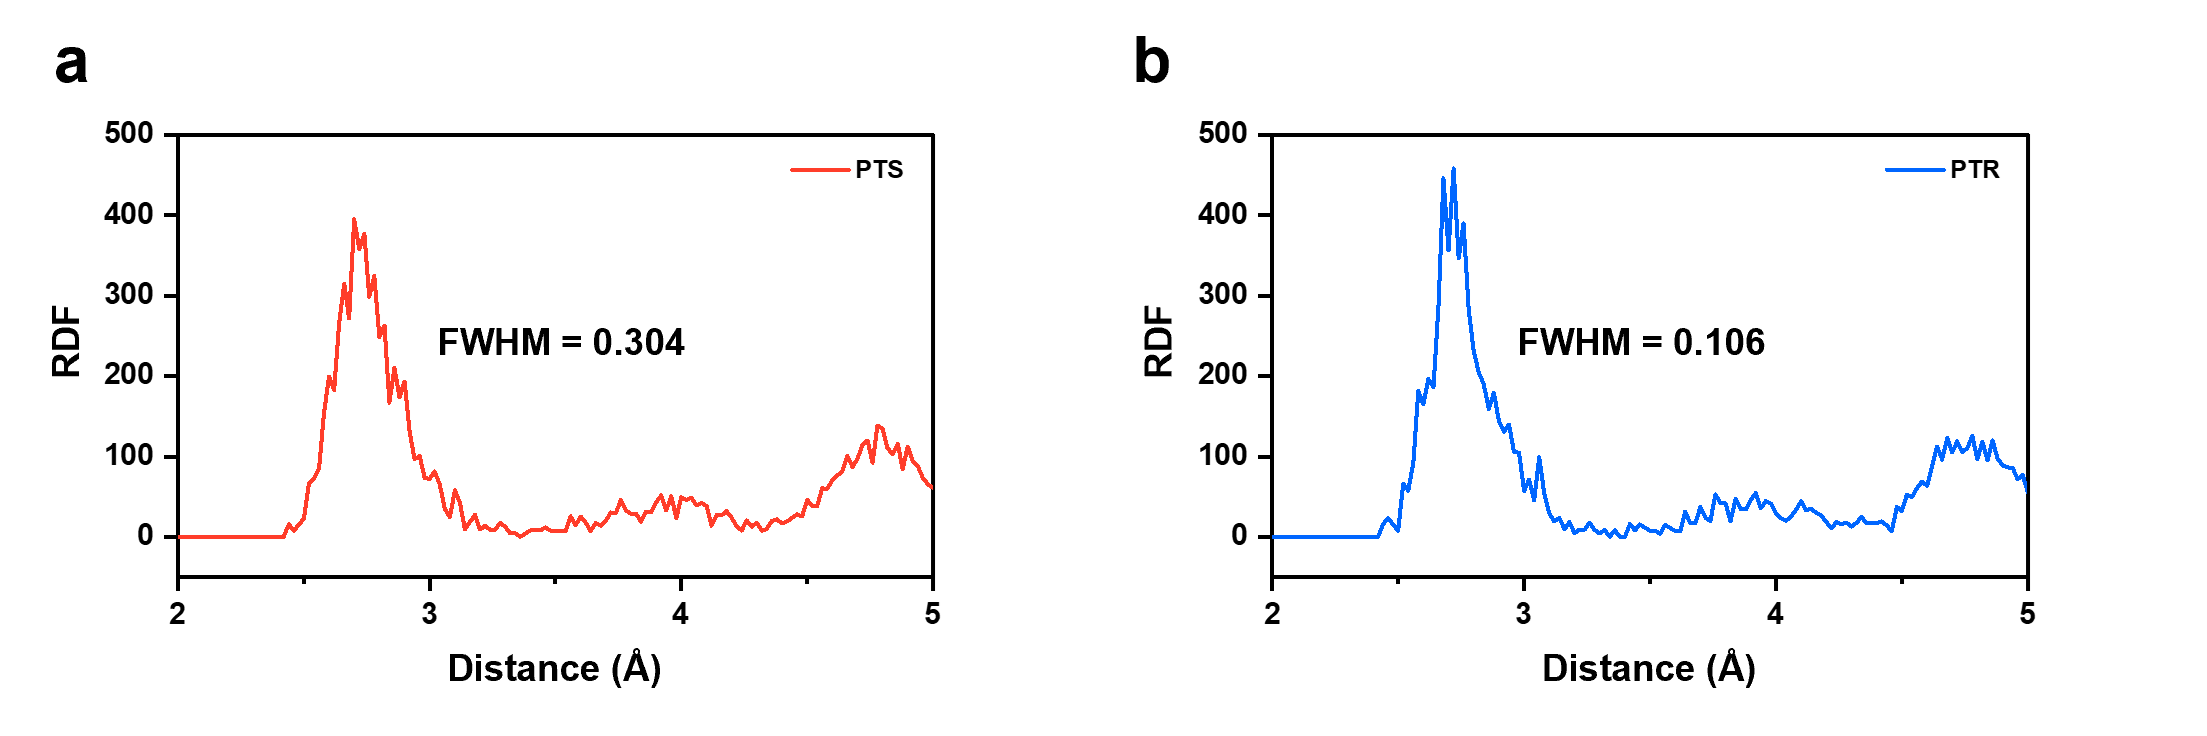
**

**Supplementary Figure 15.** Radial distribution functions (RDF) of (a) Pt201/TiO2 (001) and (b) Pt201/TiO2 (101) after 100 ps GNN-based MD simulation.

**
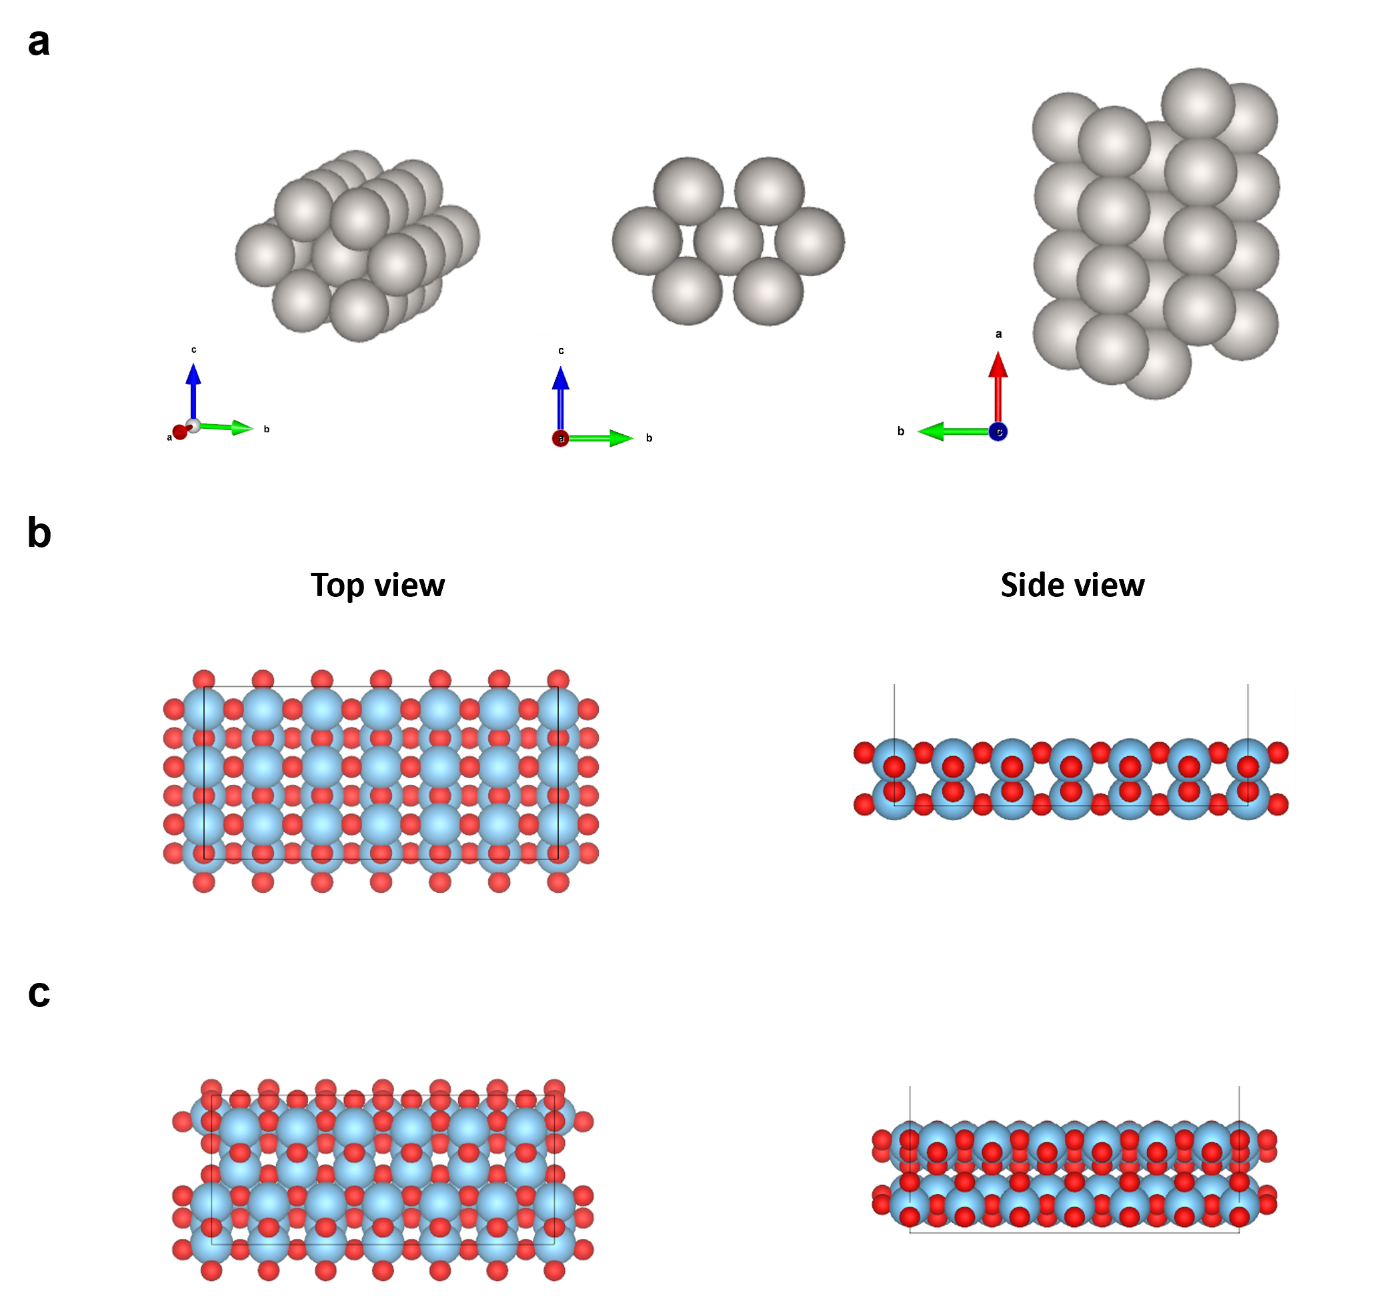
**

**Supplementary Figure 16.** Initial structural models used for DFT calculations: (a) rod-shaped Pt28 cluster, (b) TiO2 sheet exposing the (001) facet, and (c) TiO2 rhombic crystal exposing the (101) facet. Multiple viewing angles are shown to illustrate the atomic arrangement and surface orientations of each model.

**
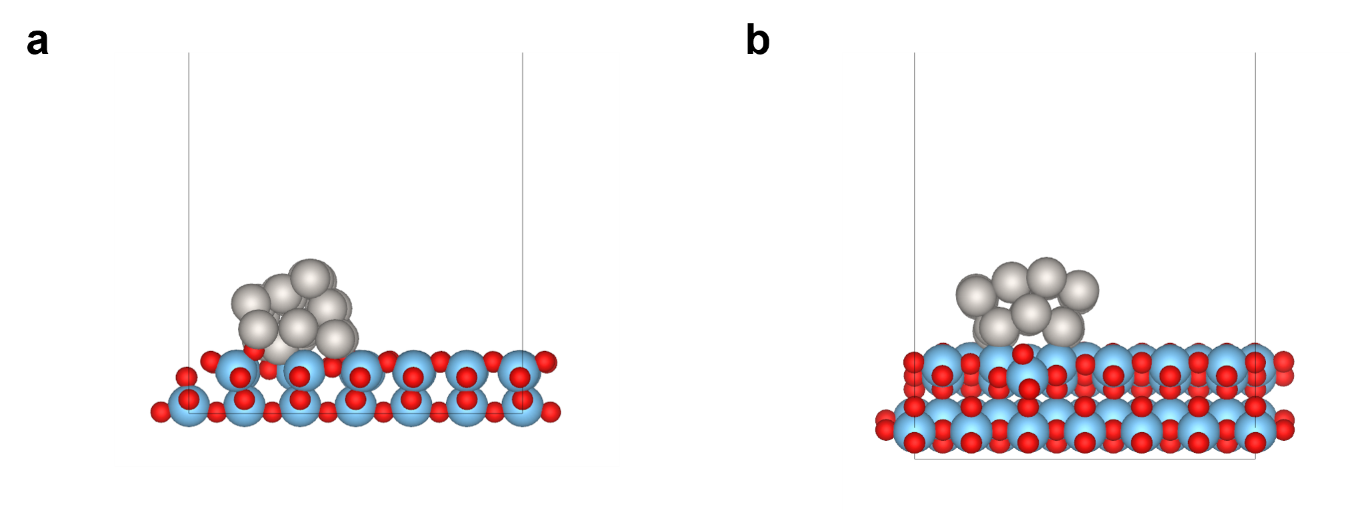
Supplementary Figure 17.** Side-view representations of DFT-optimized models: (a) Pt28 rod on TiO2 (001) facet and (b) Pt28 rod on TiO2 (101) facet.

**Supplementary Table 3.** Average Pt–Pt coordination number (CN) and corresponding bond distance (Å) with standard deviations in the DFT-optimized Pt28 rod models supported on TiO2 (001) and (101) facets.

|  | Pt/TiO2 (001)  (PTS) | Pt/TiO2 (101)  PTR |
| --- | --- | --- |
| Average Pt–Pt coordination number | 4.79 | 5.00 |
| Average Pt–Pt distance [Å] | 5.55 | 5.31 |
| Standard deviation of Pt–Pt distances [Å] | 2.23 | 2.01 |

**Supplementary Table 4.** Surface energies of TiO2 (001) and (101) facets and the corresponding normalized Pt binding energies (per Pt atom) in the DFT-optimized Pt28 rod on TiO2 models.

|  | PTS | PTR |
| --- | --- | --- |
| Surface energy of TiO2 surface [eV· Å–2] | 0.084 | 0.067 |
| Normalized Pt binding E [eV·atom–1] | -0.78 | -0.68 |

**
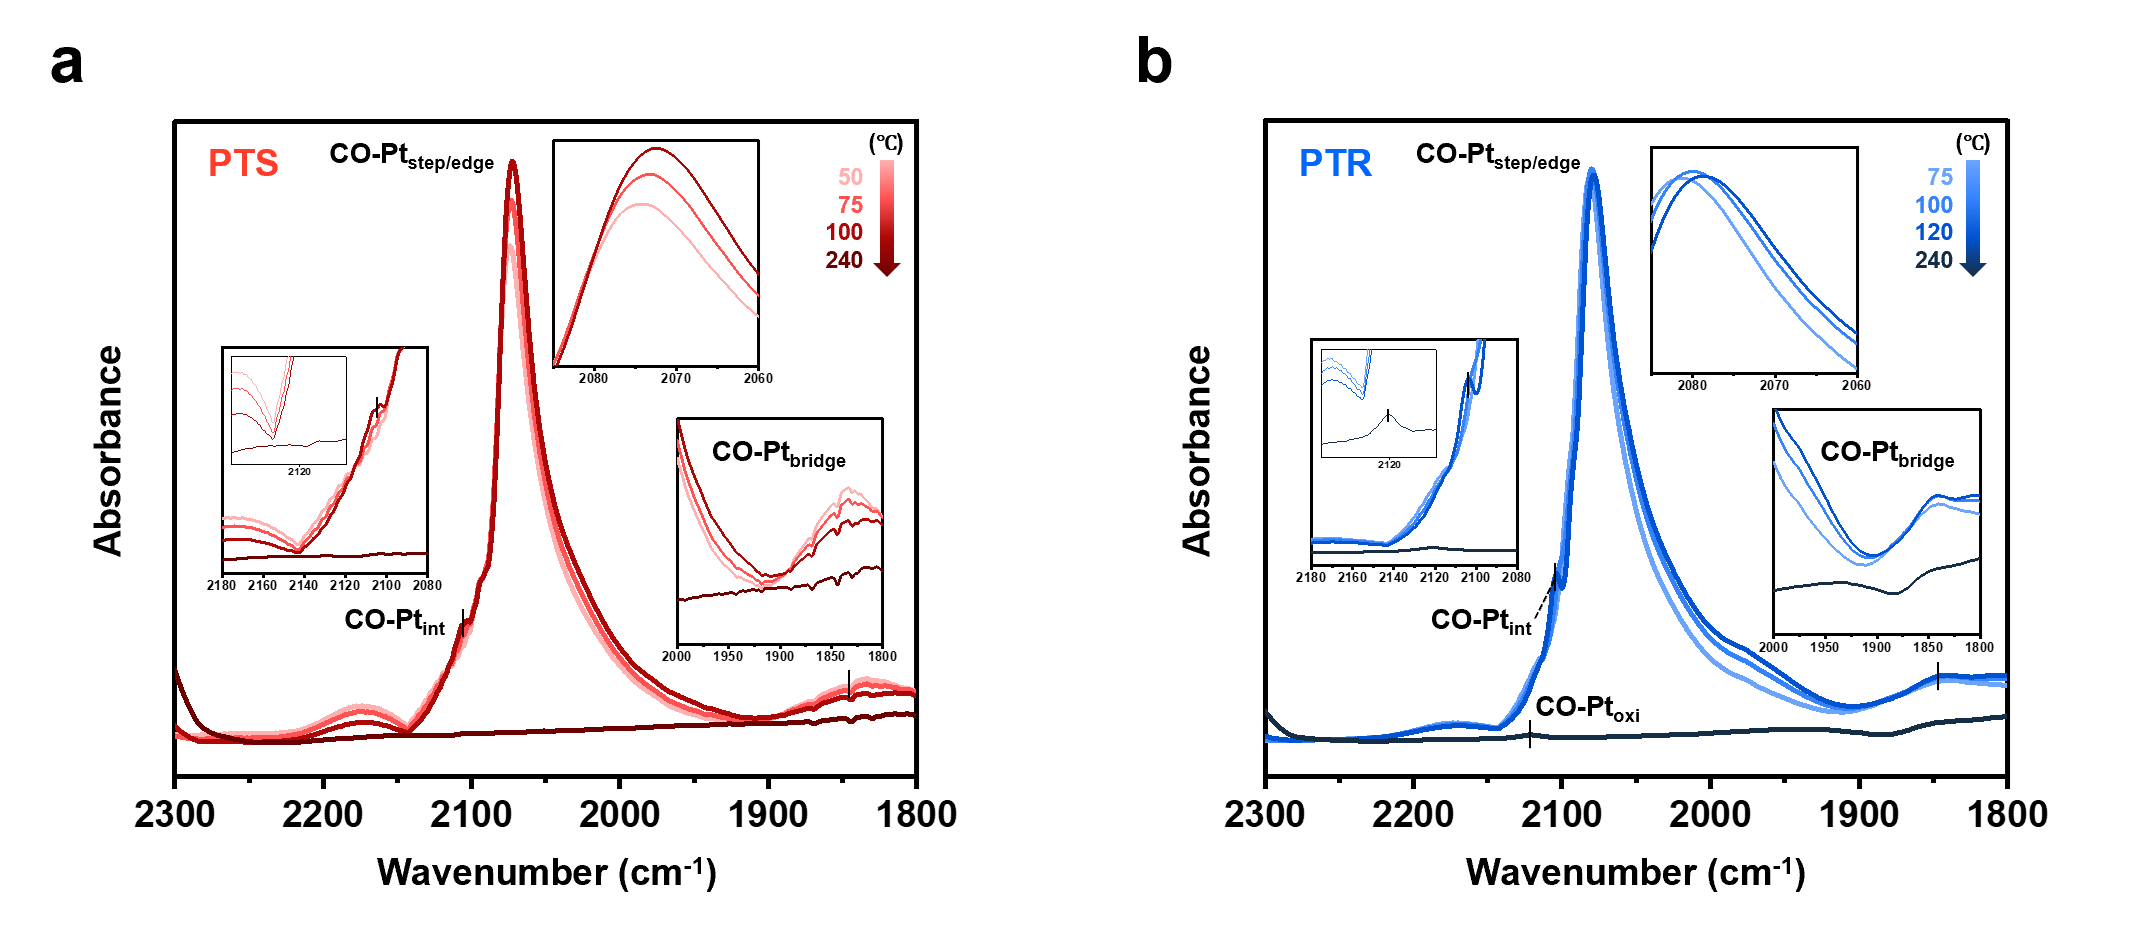
**

**Supplementary Figure 18.** *In situ* DRIFT spectra of (a) the spent PTS and (b) PTR catalysts under CO oxidation condition (CO/O2 = 1) at increasing temperatures. Characteristic bands corresponding to CO adsorbed on interfacial and oxidized Pt sites, along with the evolution of surface species, highlight facet-dependent reconstruction and CO adsorption behavior after catalytic operation.


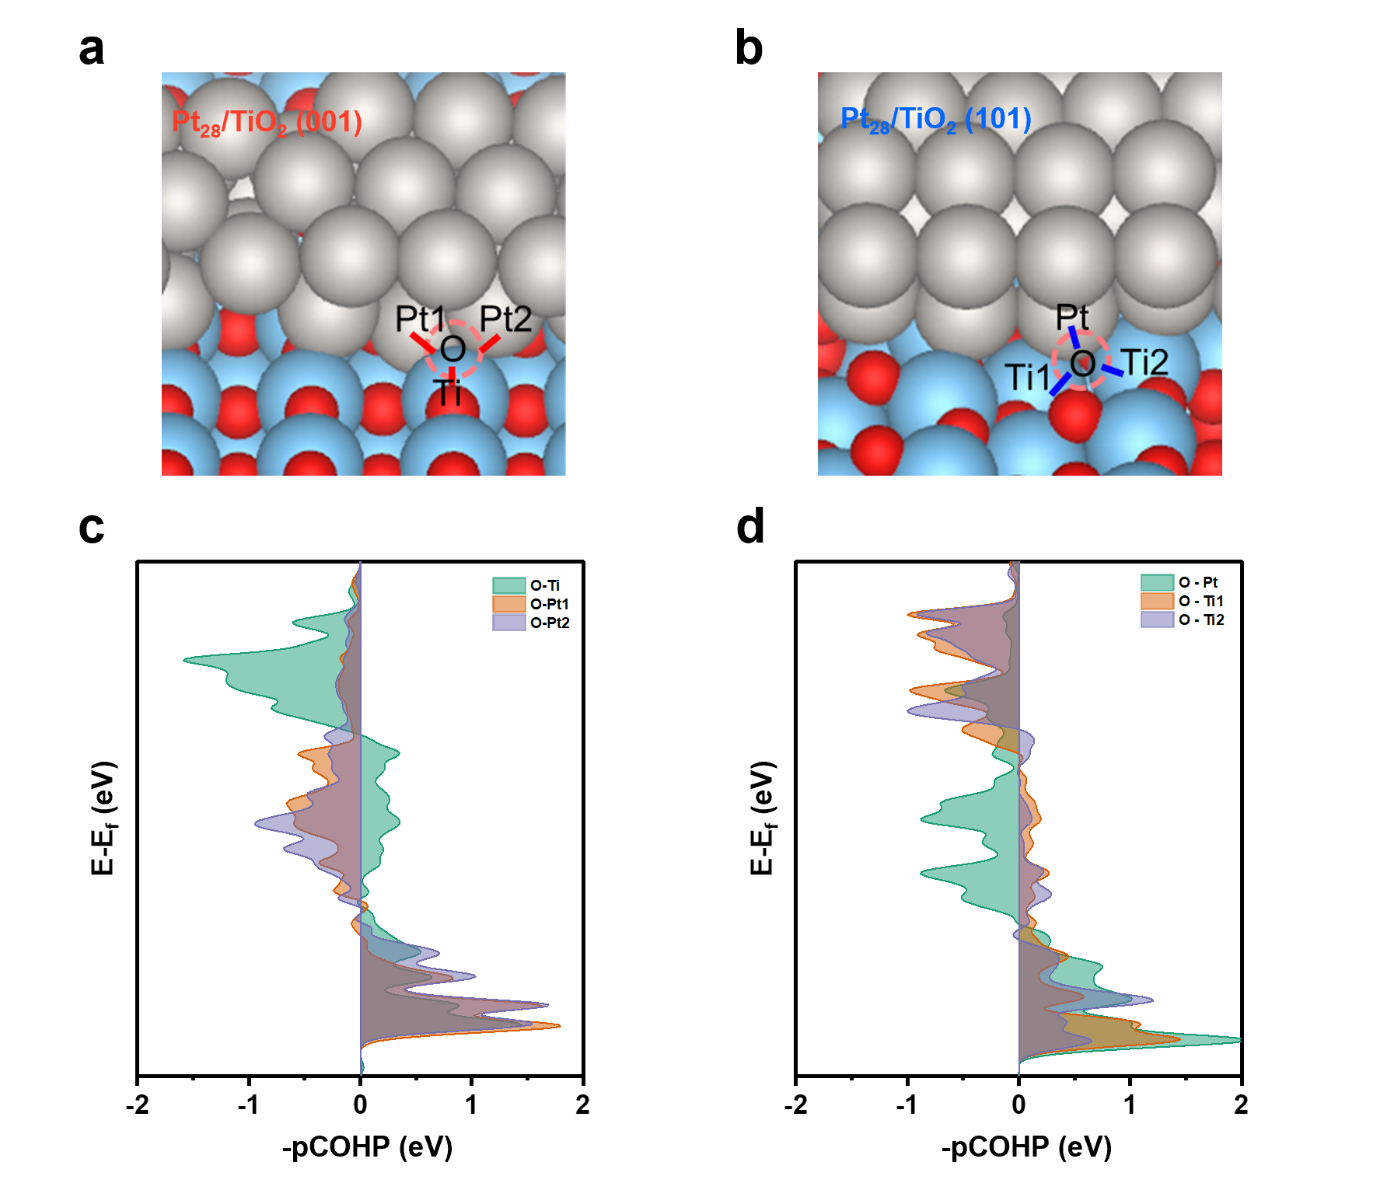


**Supplementary Figure 19.** The active oxygen vacancy site and its neighboring bonds for (a) Pt28/TiO2 (001) and (b) Pt28/TiO2 (101), along with the corresponding −pCOHP analysis results for oxygen vacancy formation at the Pt–TiO2 interface: (c) Pt28/TiO2 (001) and (d) Pt28/TiO2 (101). Colored curves indicate the −pCOHP for individual bonds between the selected oxygen vacancy site and its neighboring Pt/Ti atoms, as shown in (a) and (b).

**
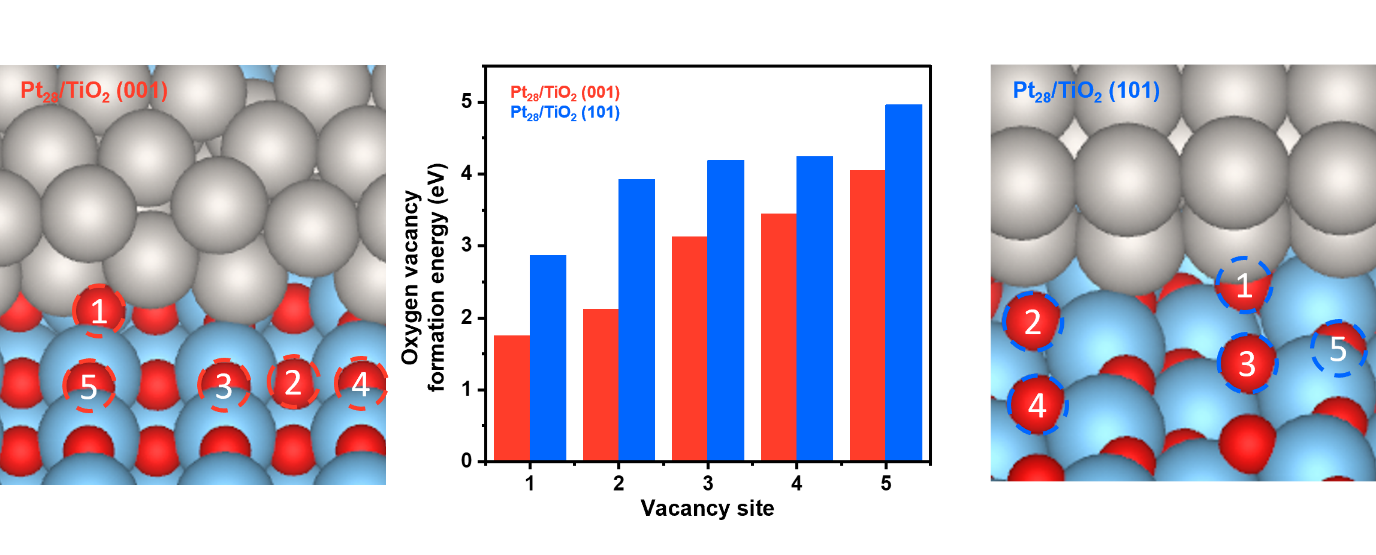
Supplementary Figure 20.** Possible oxygen vacancy formation sites at the Pt–TiO2 interface for both (001) and (101) surfaces in the Pt28/TiO2 models, along with the corresponding calculated formation energies for each site.

**
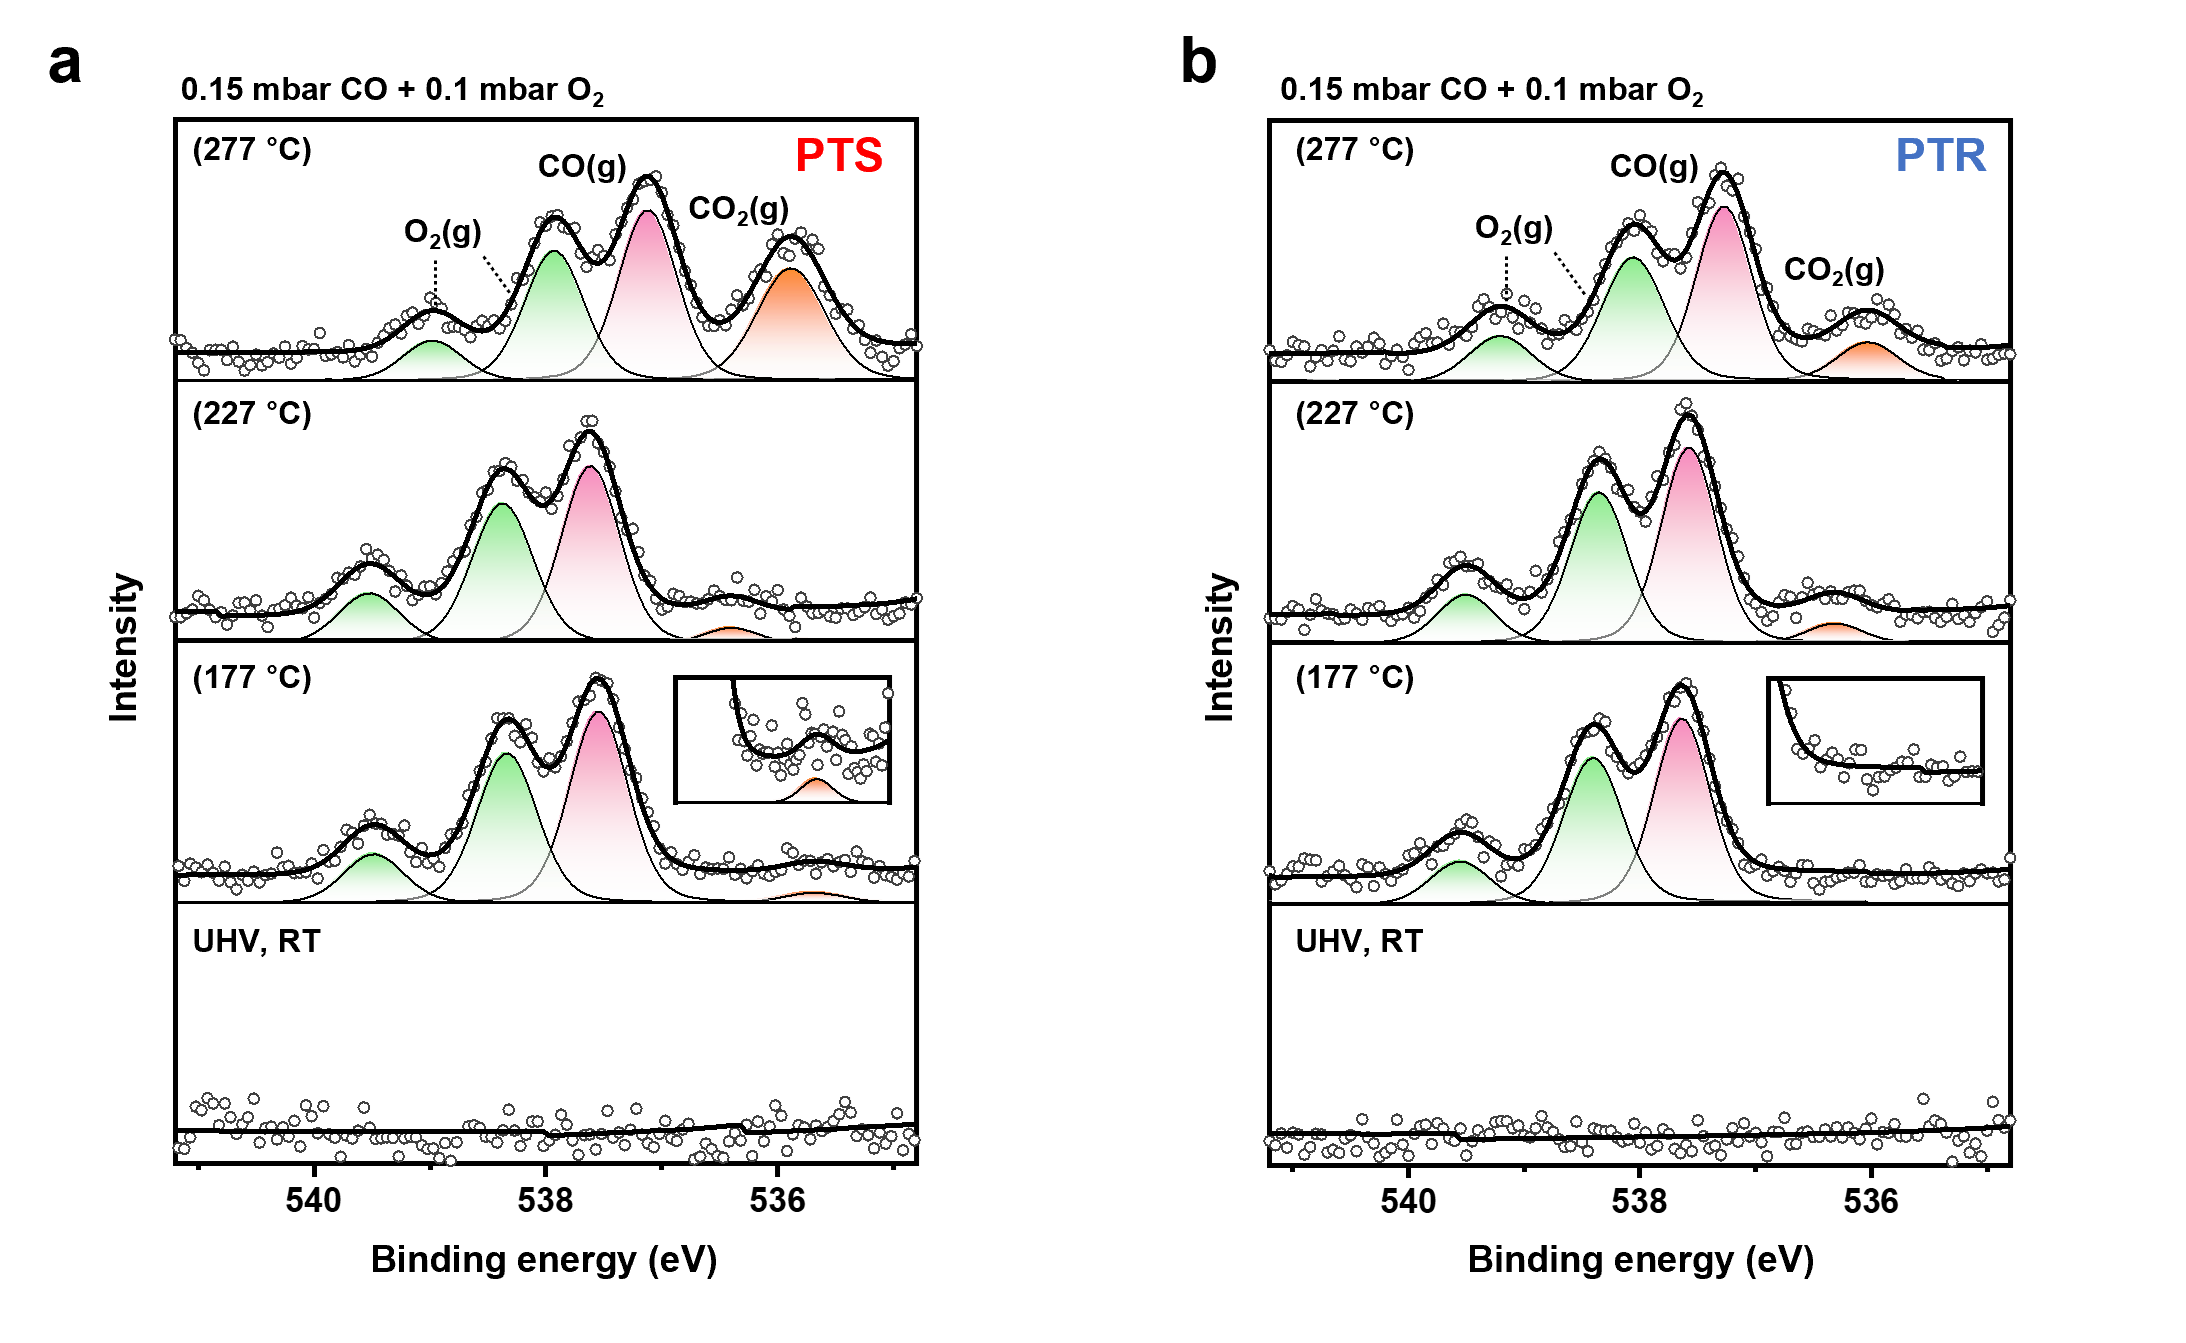
**

**Supplementary Figure 21.** Enlarged view of the gas-phase region in the O *1s* AP-XP spectra (*hv* = 640 eV) for (a) PTS and (b) PTR under UHV and CO oxidation conditions (0.15 mbar of CO and 0.1 mbar of O2) at various temperatures (RT, 177, 227, and 277 °C).

**
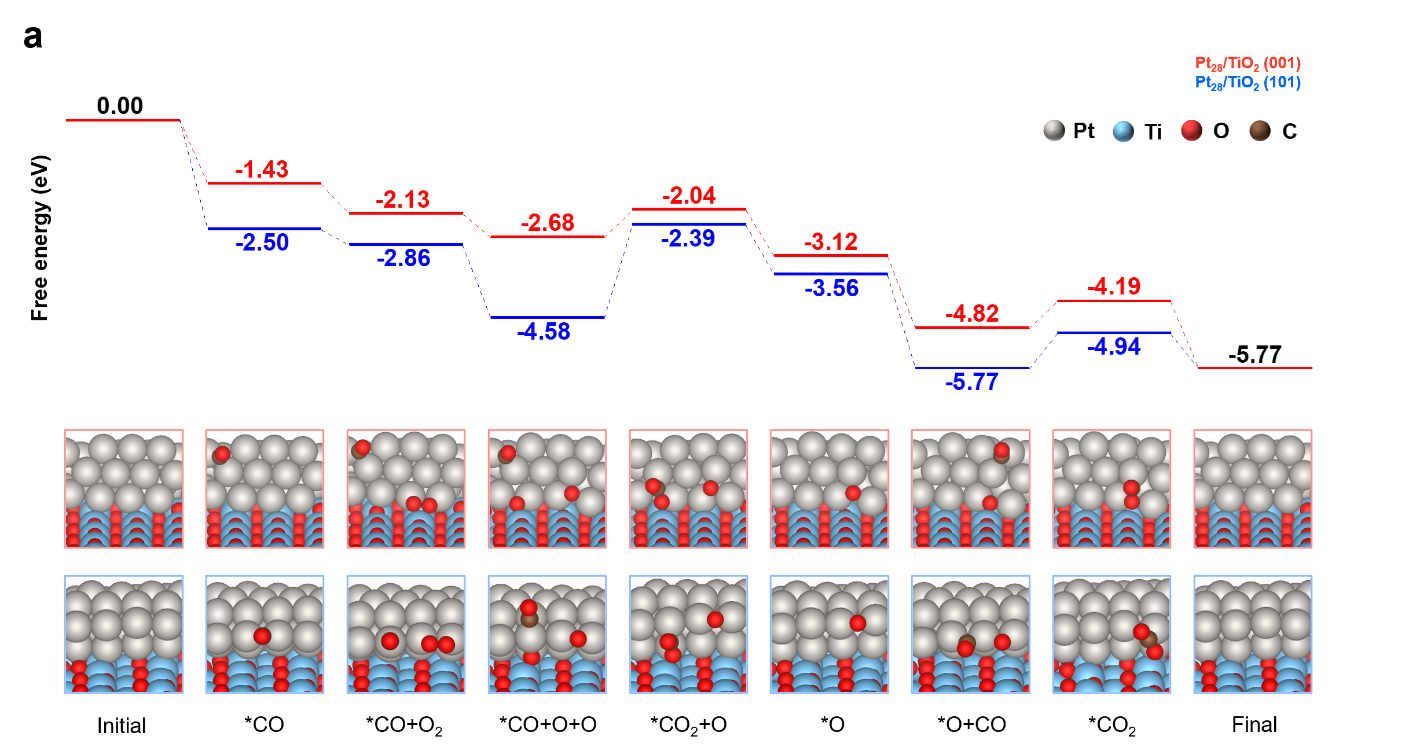
**

**Supplementary Figure 22.** Reaction energy profiles for CO oxidation via the L–H mechanism on Pt28/TiO2 (001) and Pt28/TiO2 (101) models. The energy barriers associated with the co-adsorbed *CO and *O reaction step highlight the facet-dependent differences in activation energy and rate-determining steps.


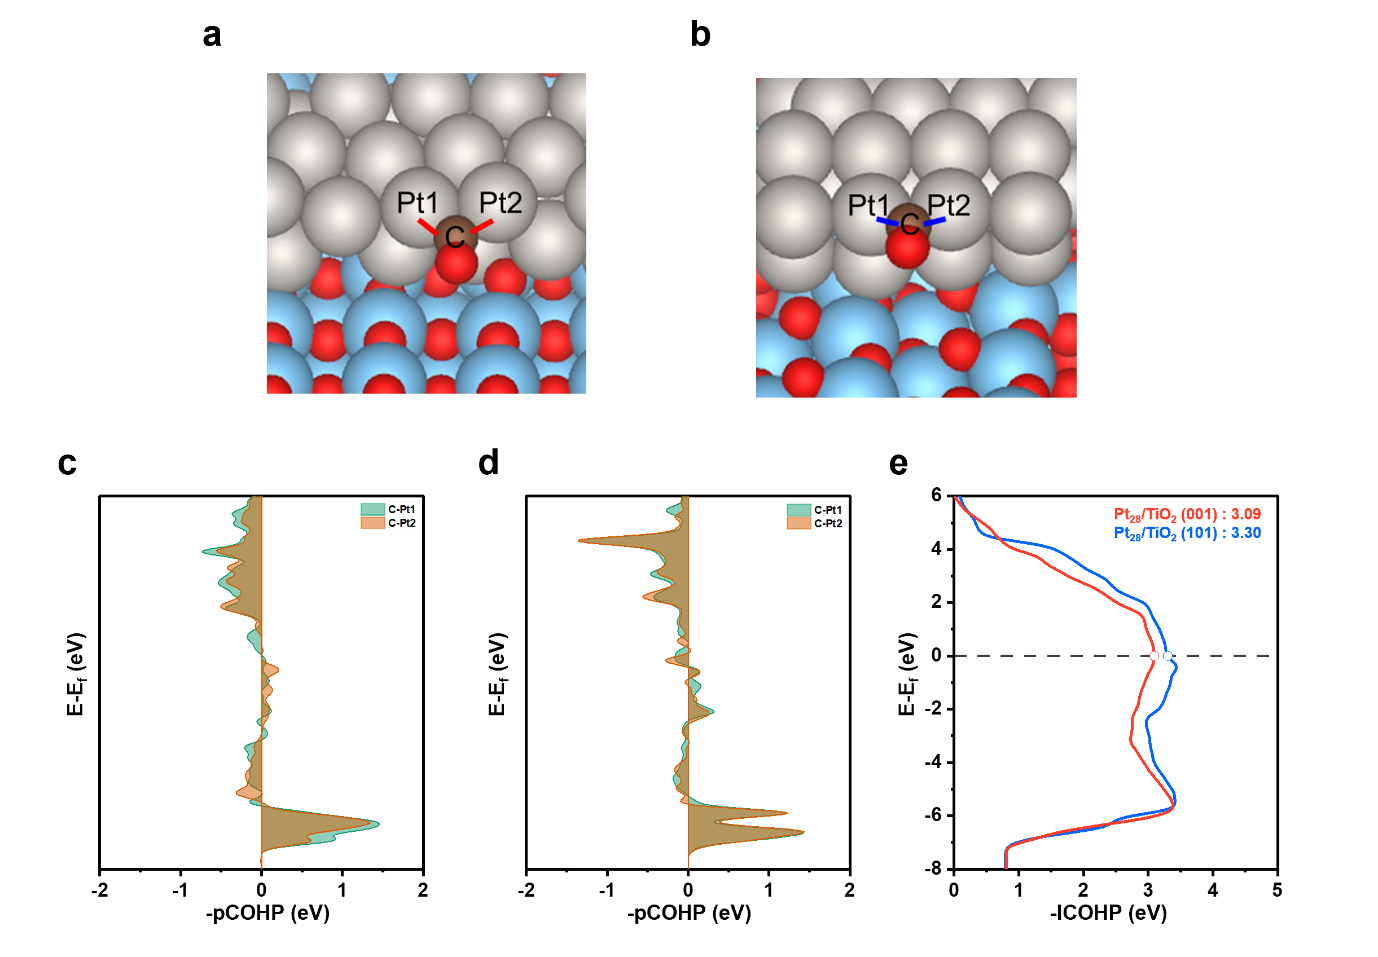


**Supplementary Figure 23.** The active CO adsorption site and corresponding Pt–C bonds for (a) Pt28/TiO₂ (001) and (b) Pt28/TiO₂ (101), along with the −pCOHP analysis of CO adsorption at the Pt site: (c) Pt28/TiO2 (001) and (d) Pt28/TiO2 (101) models. Colored curves represent the −pCOHP for individual Pt–C bonds between the adsorbed CO molecule (C atom) and the neighboring Pt atoms indicated in (a) and (b).

| Catalysts | O50-600 °C (μmol·m–2) |
| --- | --- |
| TiO2 sheet (001), (TiO2-S) | 1.70 |
| TiO2 rhombic (101), (TiO2-R) | 2.06 |
| PTS | 3.13 |
| PTR | 2.85 |

**
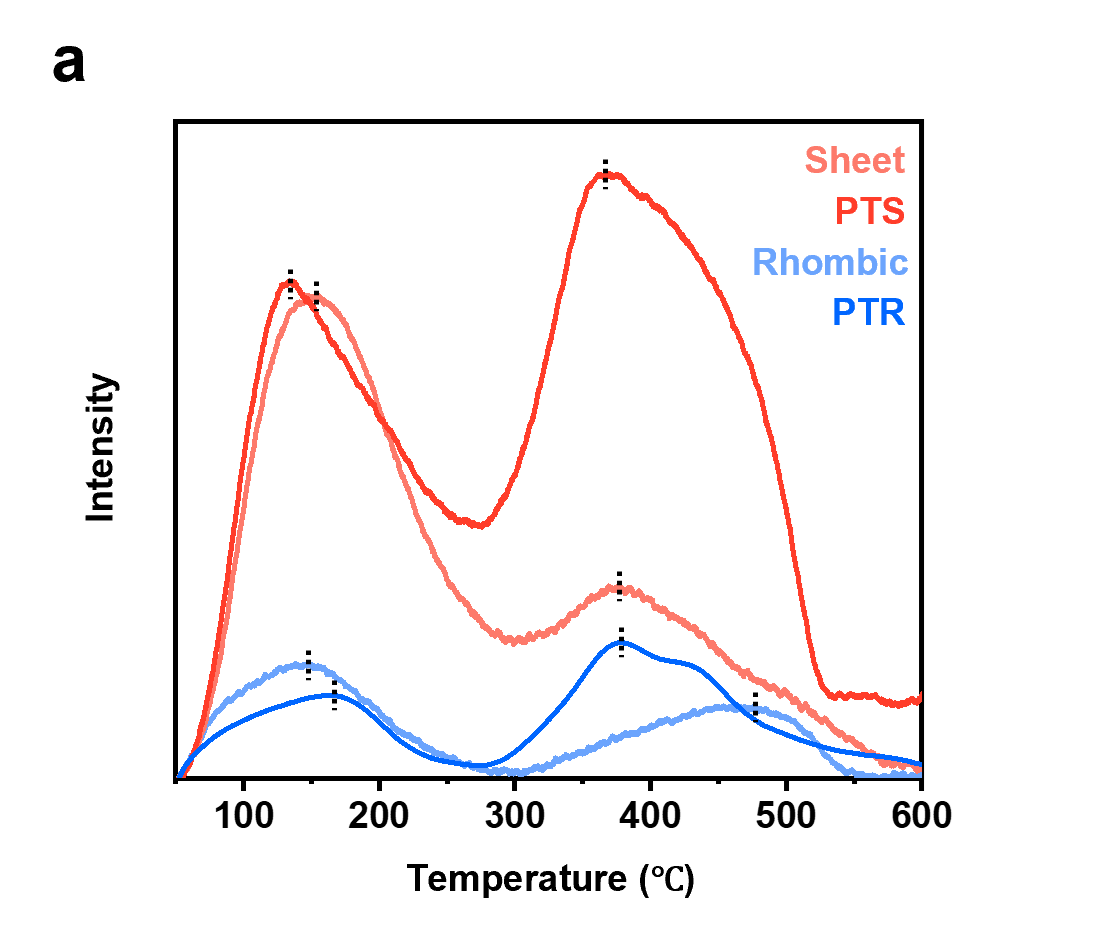
Supplementary Figure S24.** (a) O2-TPD profiles of pristine TiO2 and Pt/TiO2 catalysts, showing distinct desorption features attributed to superoxide (O2–, 100–300 °C) and peroxide (O–, 300–600 °C) species. (b) Corresponding oxygen storage capacity values integrated from 50 to 600 °C and normalized by the specific surface area, highlighting enhanced oxygen mobility and activation upon Pt loading, particularly on the TiO2 (001) facet.

**
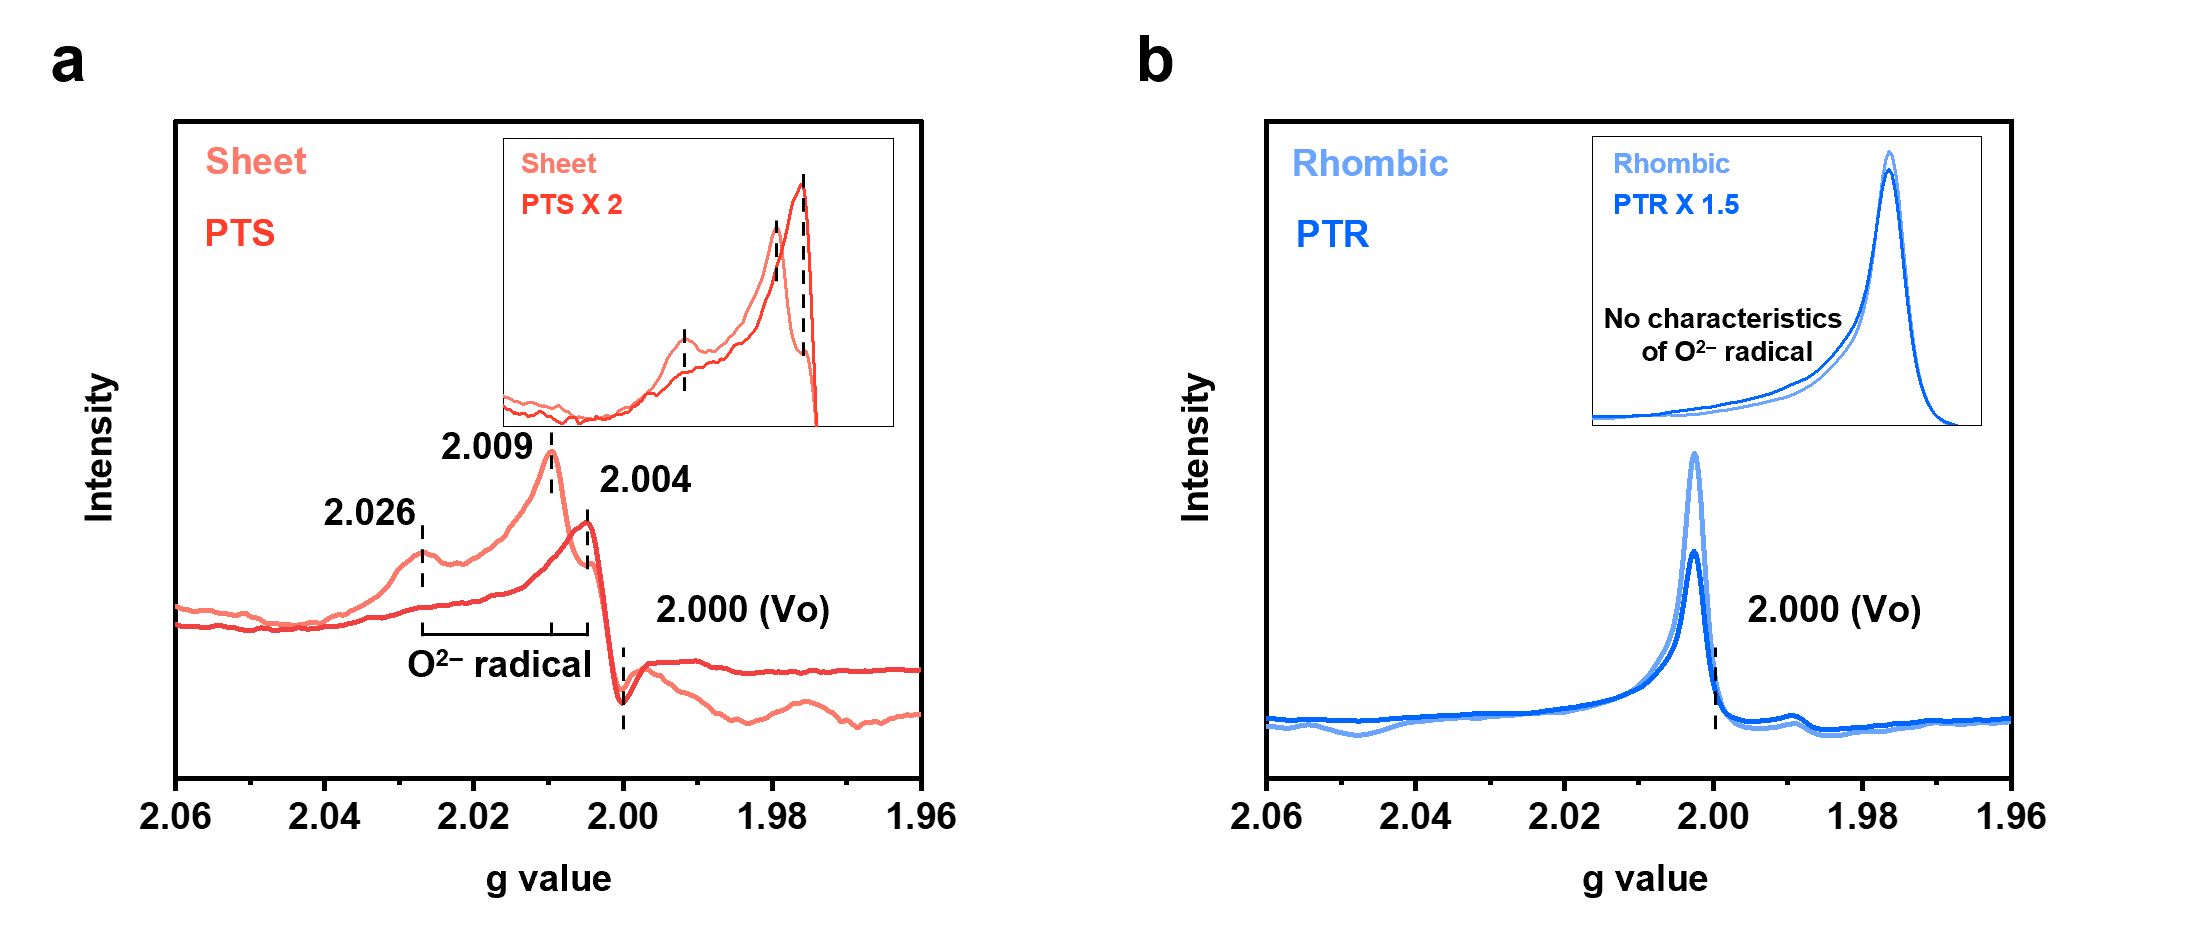
**

**Supplementary Figure 25.** EPR spectra of (a) pristine TiO2 sheet with predominantly exposed (001) the corresponding Pt-loaded catalyst (PTS), and (b) pristine TiO2 rhombic with exposed (101) facets and the corresponding Pt-loaded catalyst (PTR). The inset figures in both panels highlight that the EPR signals exhibit facet-dependent characteristics of TiO2 upon Pt loading.

**
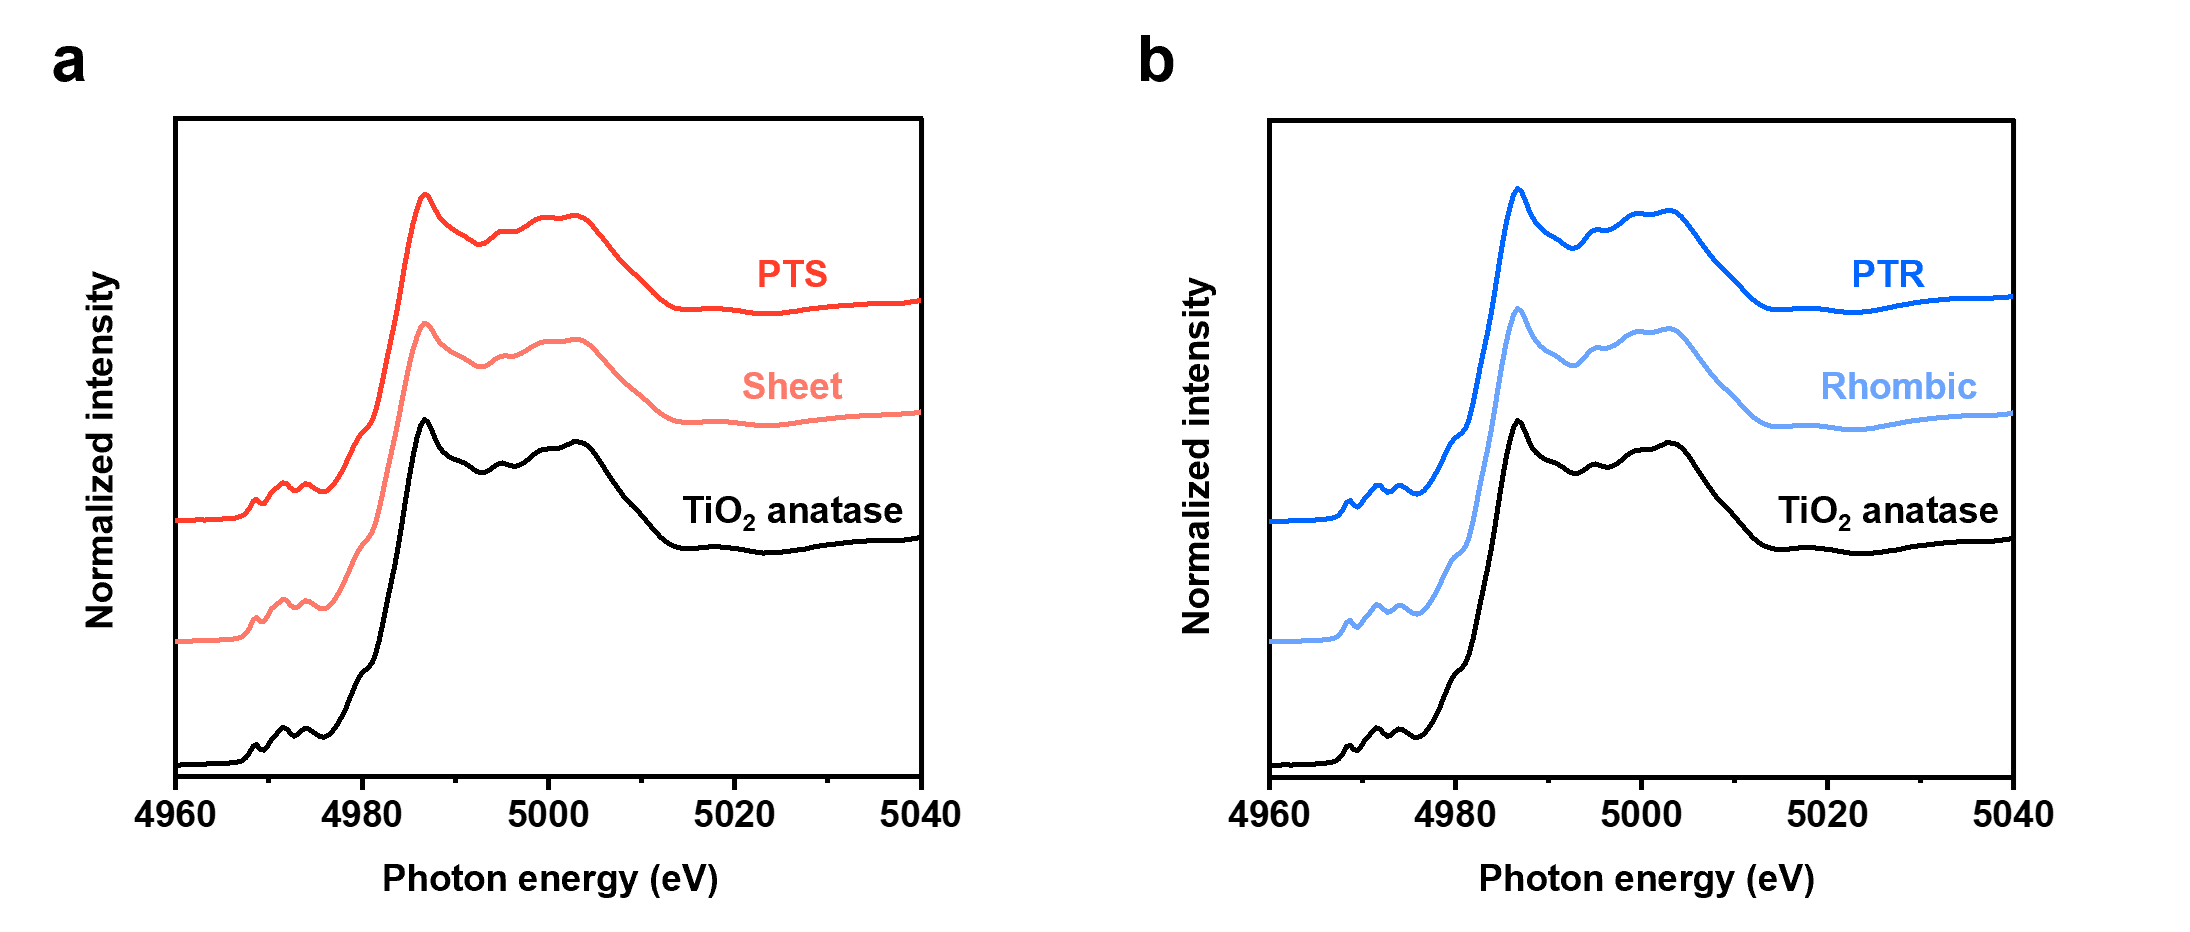
**

**Supplementary Figure 26.** Ti *K*-edge XANES spectra of (a) pristine TiO2 sheet and Pt-loaded PTS catalyst and (b) pristine TiO2 rhombic and Pt-loaded PTR catalyst.

**
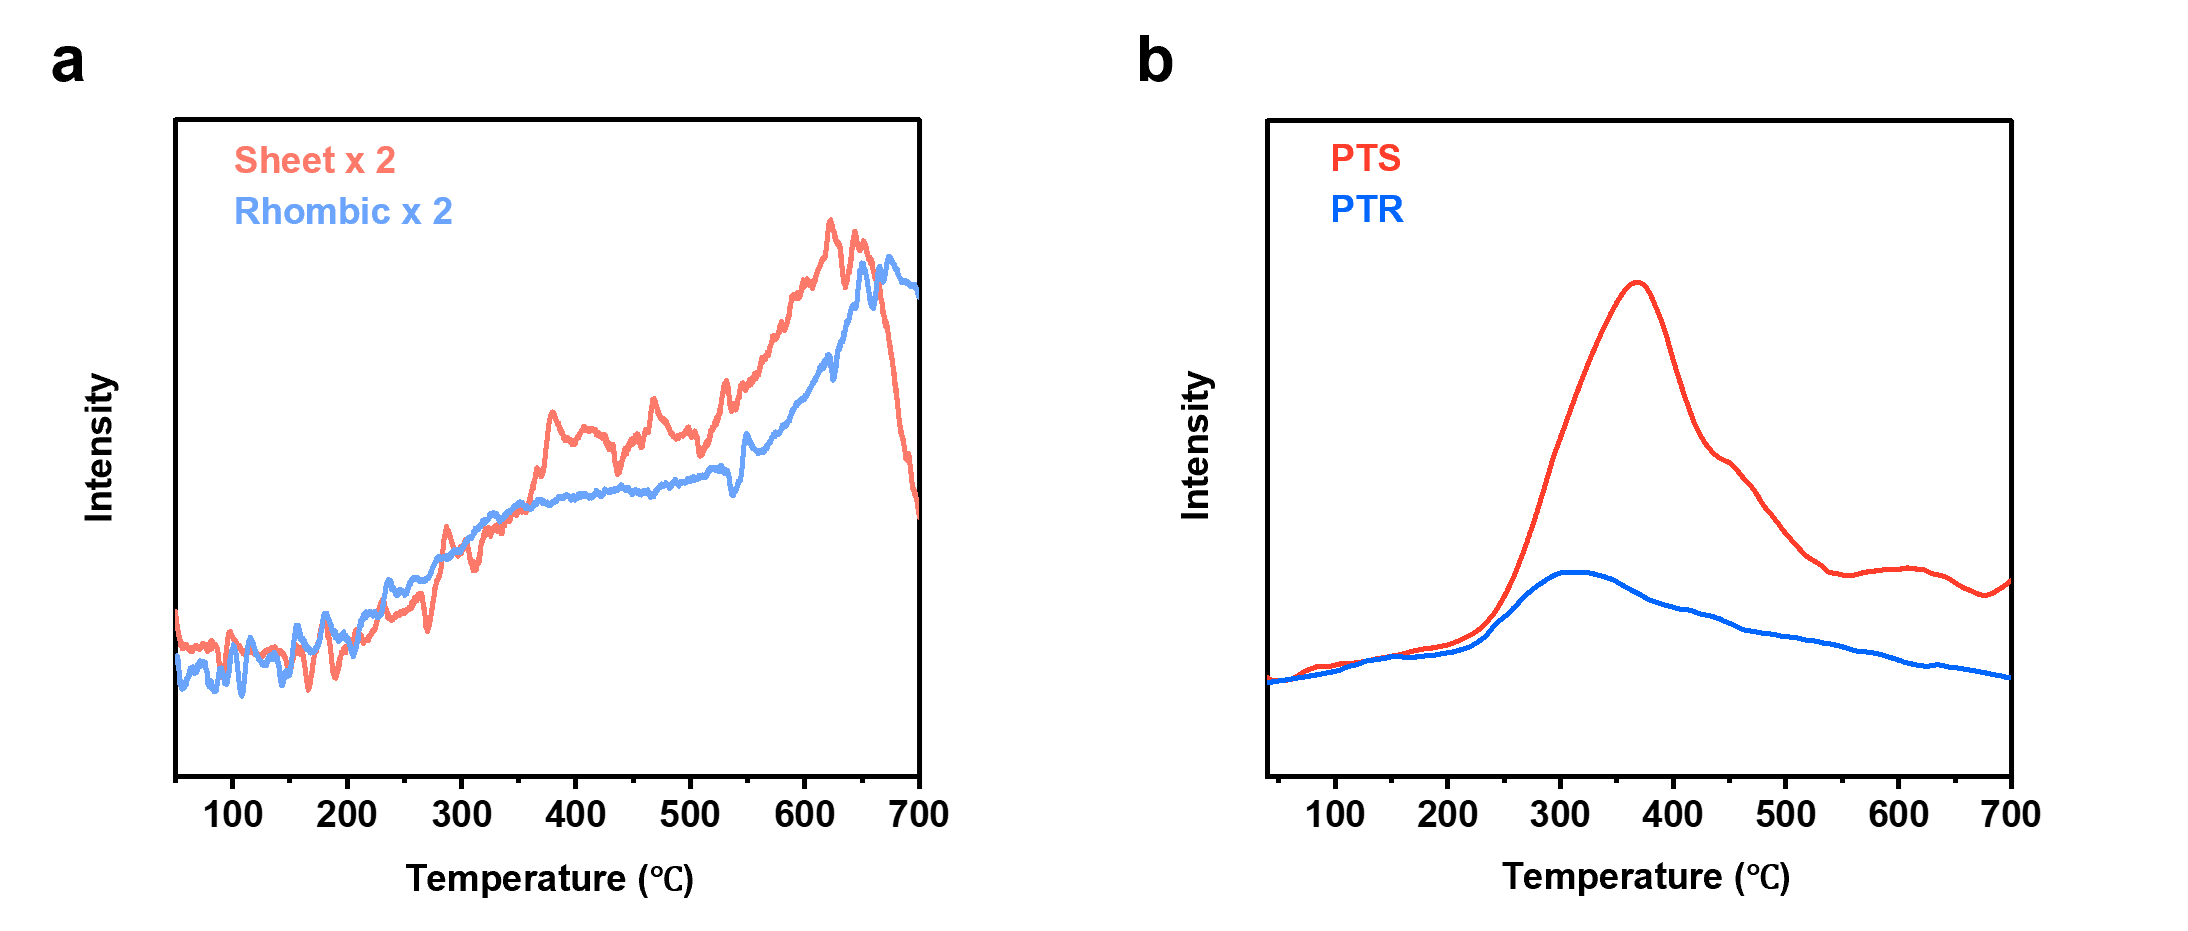
**

**Supplementary Figure 27.** H2-TPRprofiles of (a) pristine TiO₂ supports and (b) Pt-loaded TiO2 catalysts.

**
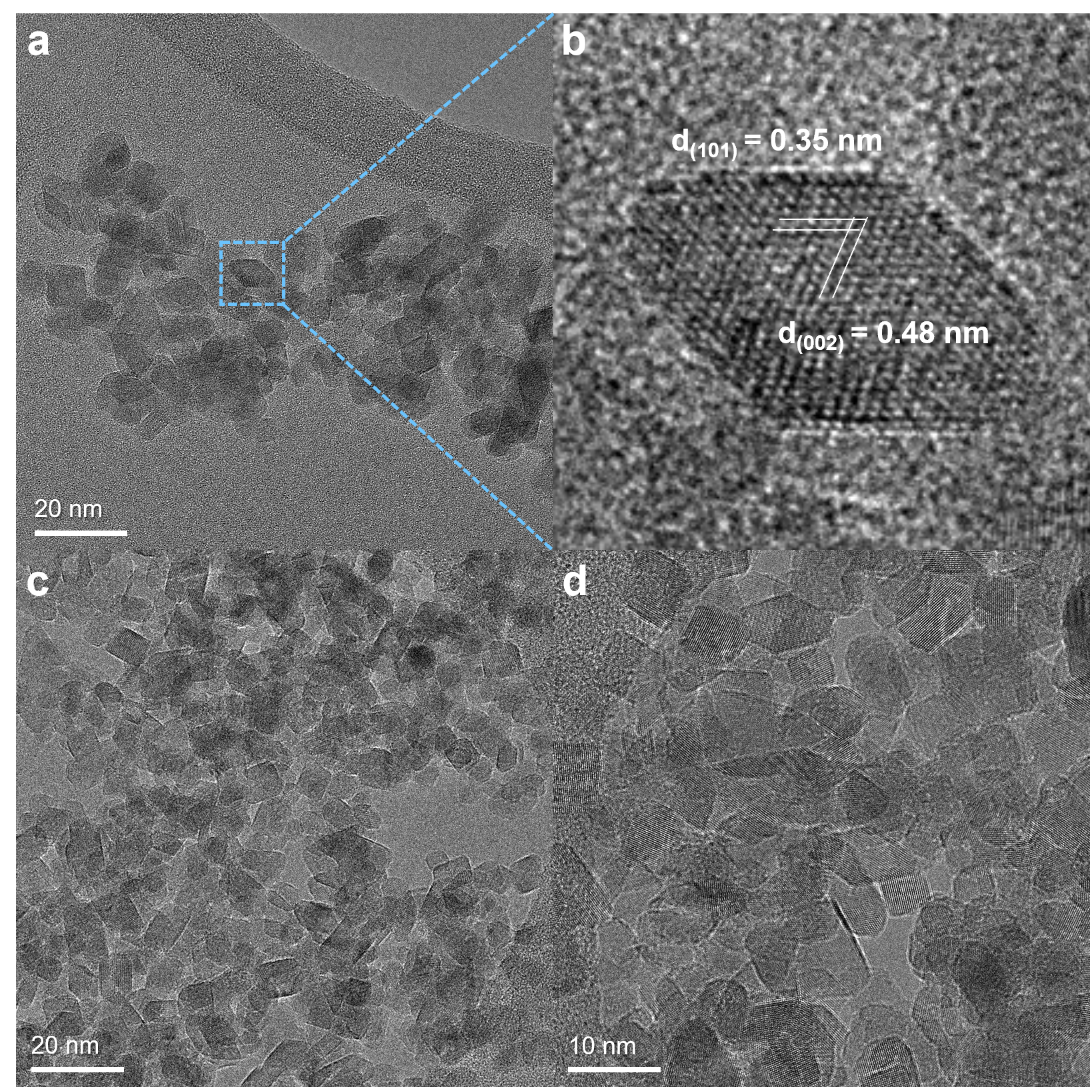
**

**Supplementary Figure 28.** TEM images of pristine TiO2-r samples predominantly exposing the (101) facet, showing rhombic morphology.

**
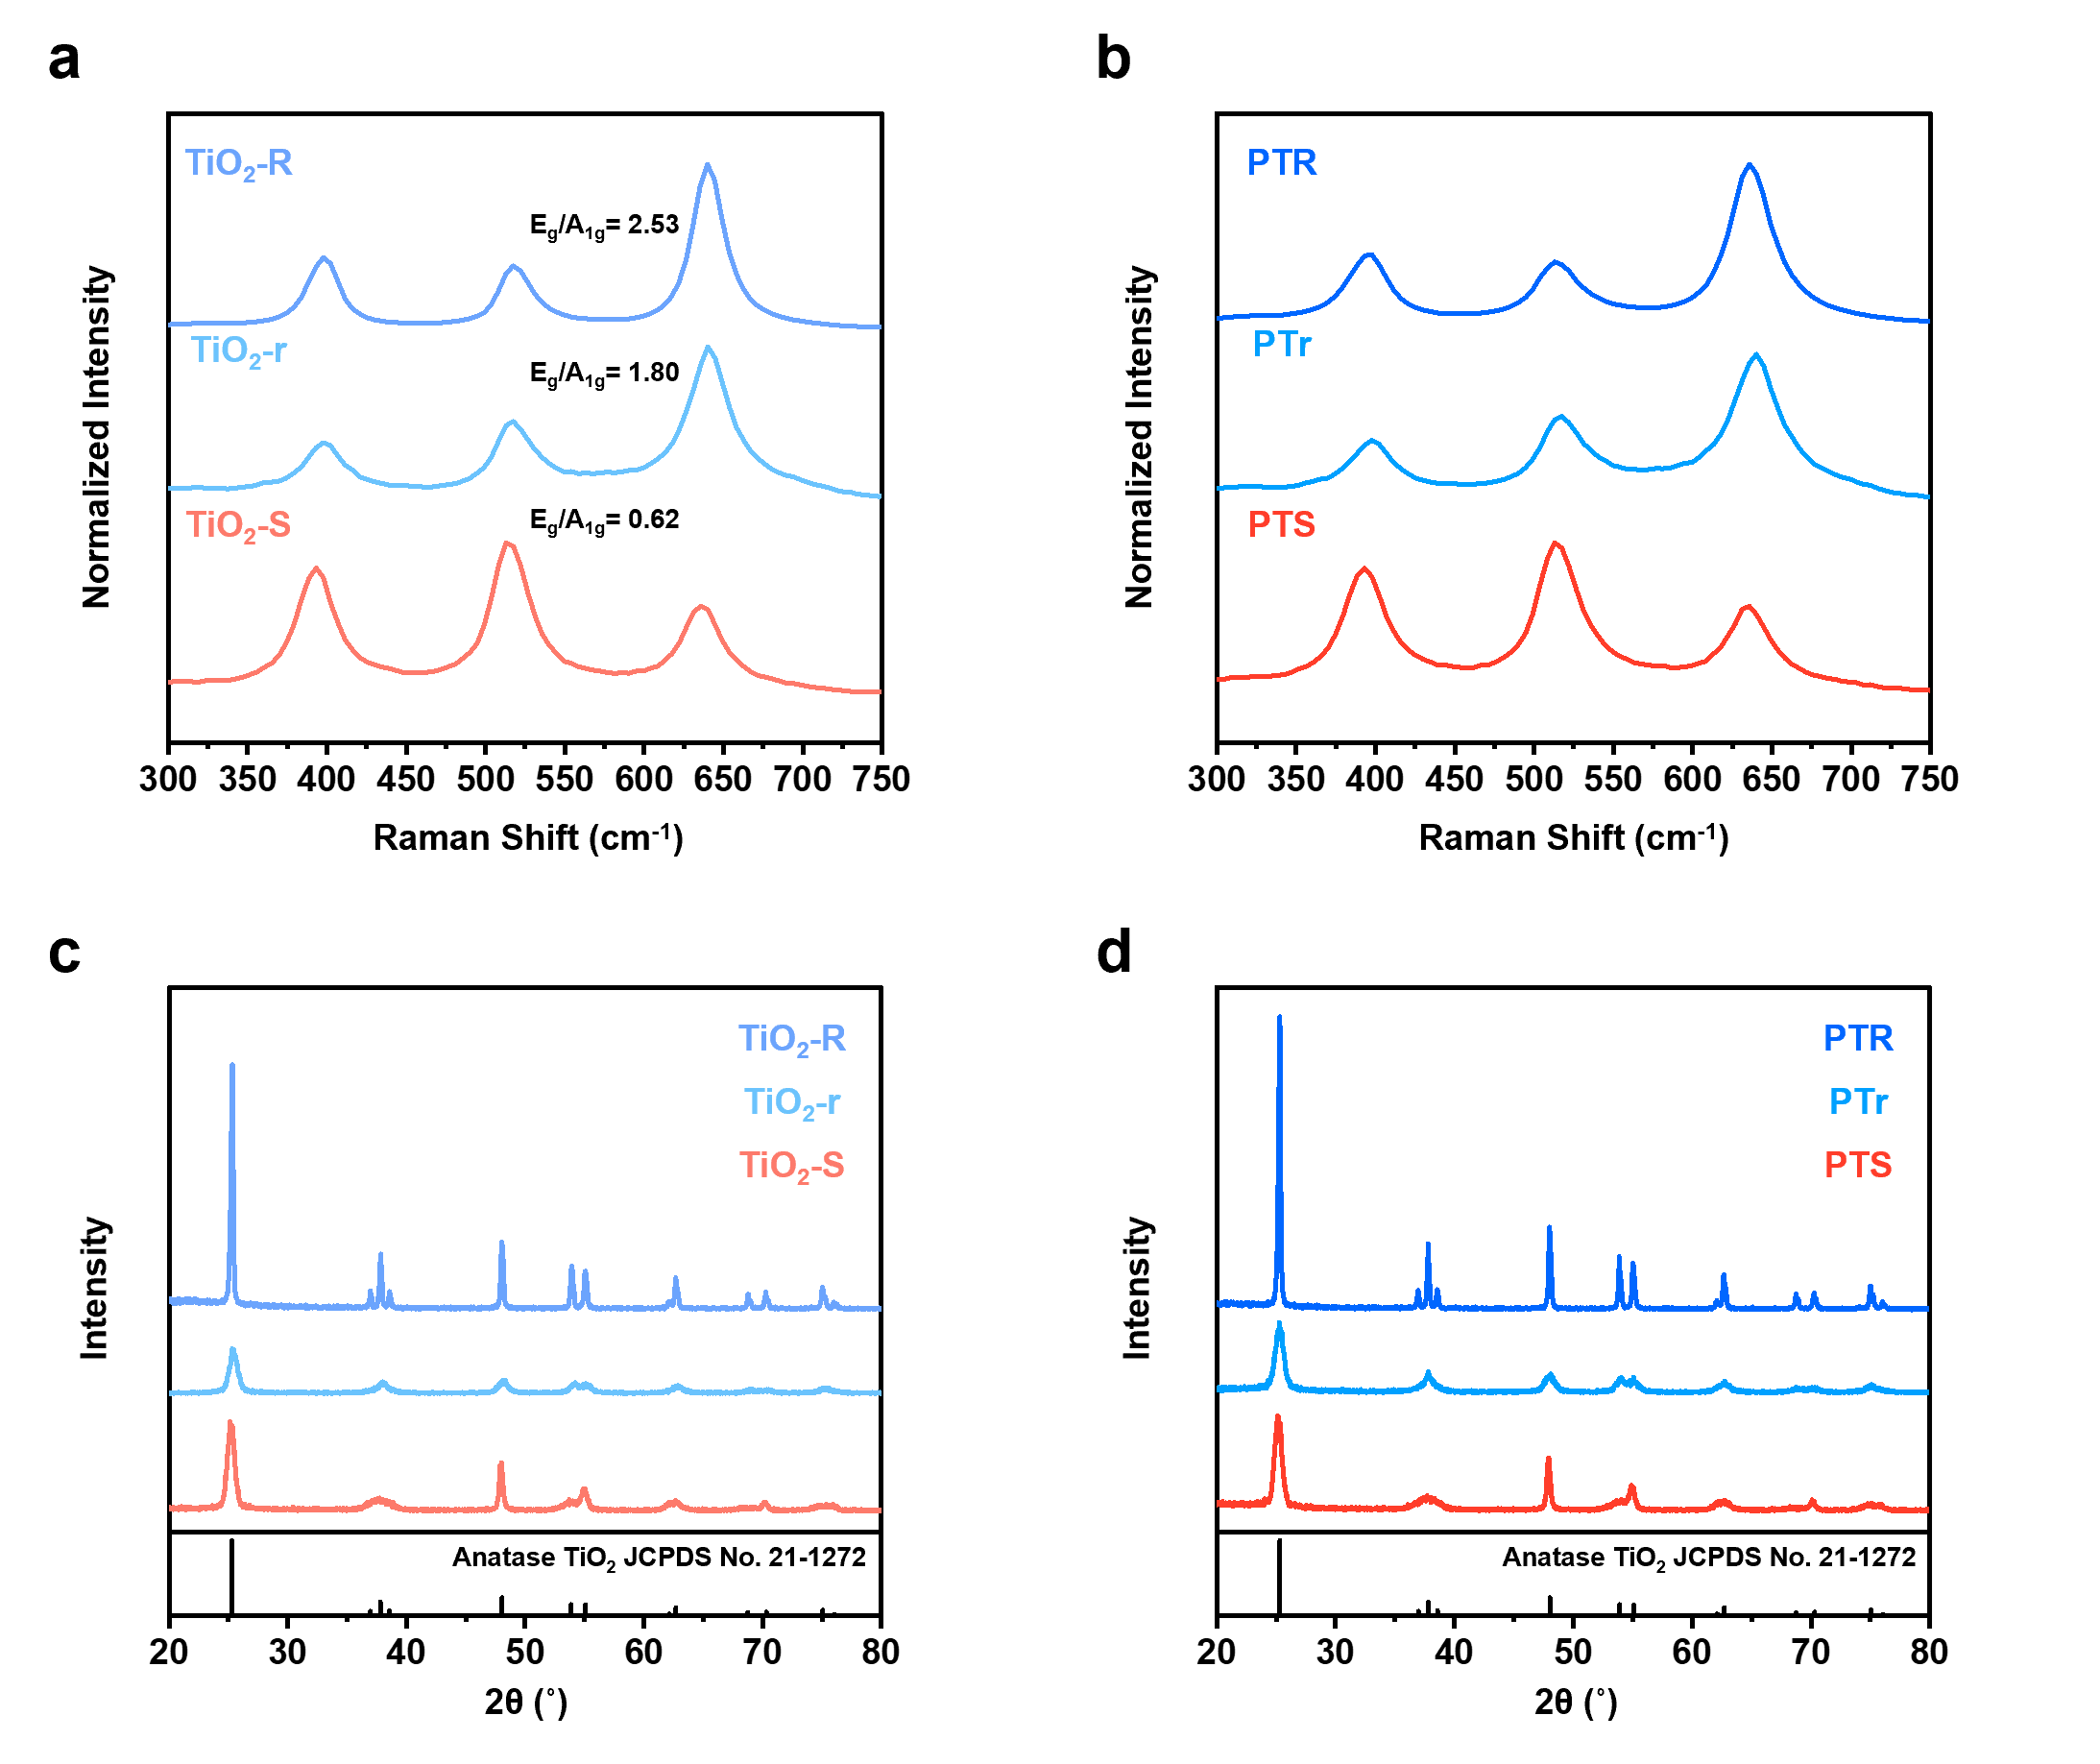
**

**Supplementary Figure 29.** (a, b) Raman spectra of (a) pristine TiO2 supports and (b) fresh Pt/TiO2 catalysts. (c, d) XRD patterns of (c) pristine TiO2 and (d) fresh Pt/TiO2 catalysts.

**
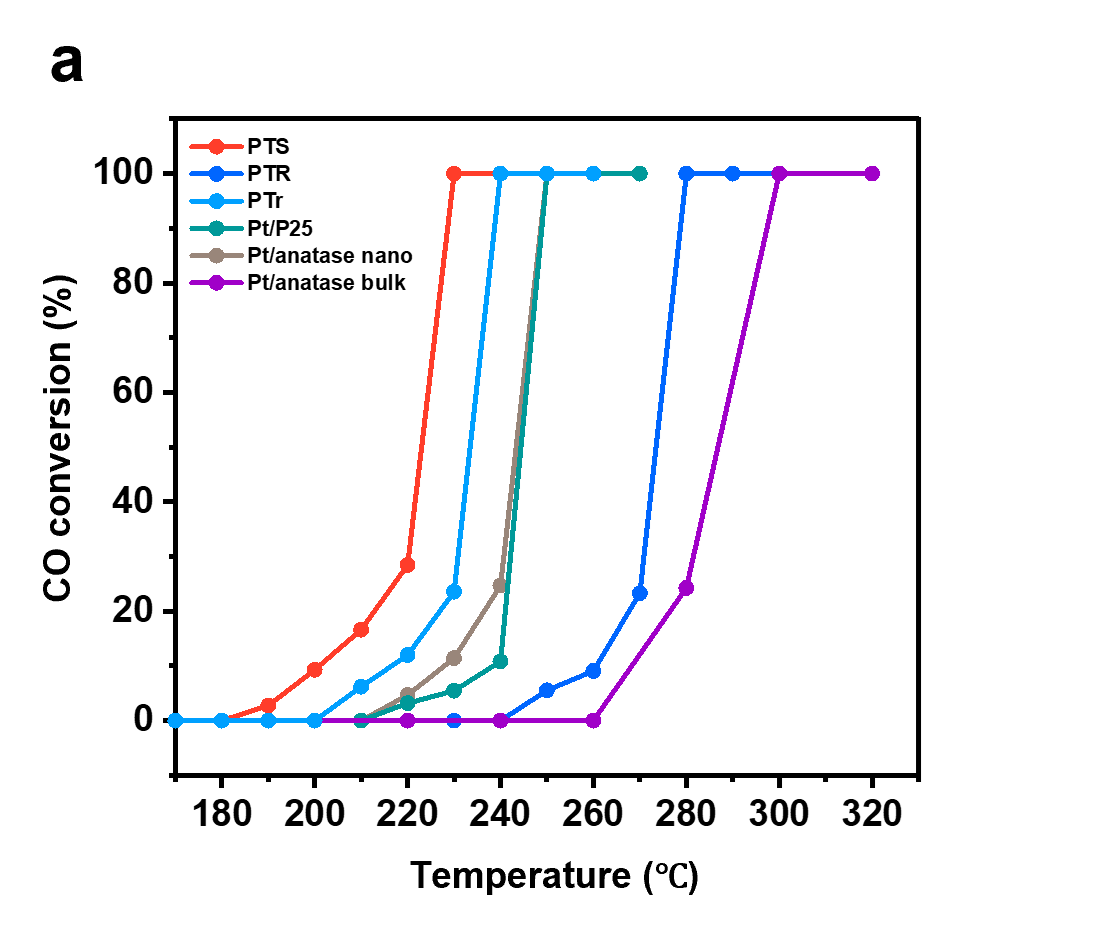
**

**Supplementary Figure 30.** CO conversion curves of Pt/TiO2 catalysts prepared using synthesized TiO2 supports (TiO2-S, TiO2-r, and TiO2-R) and commercial TiO2 powders (P25, anatase nanopowder, and bulk powder). Catalytic tests were conducted under a 2% CO + 2% O2/Ar flow (Total 50 mL·min⁻¹).

**
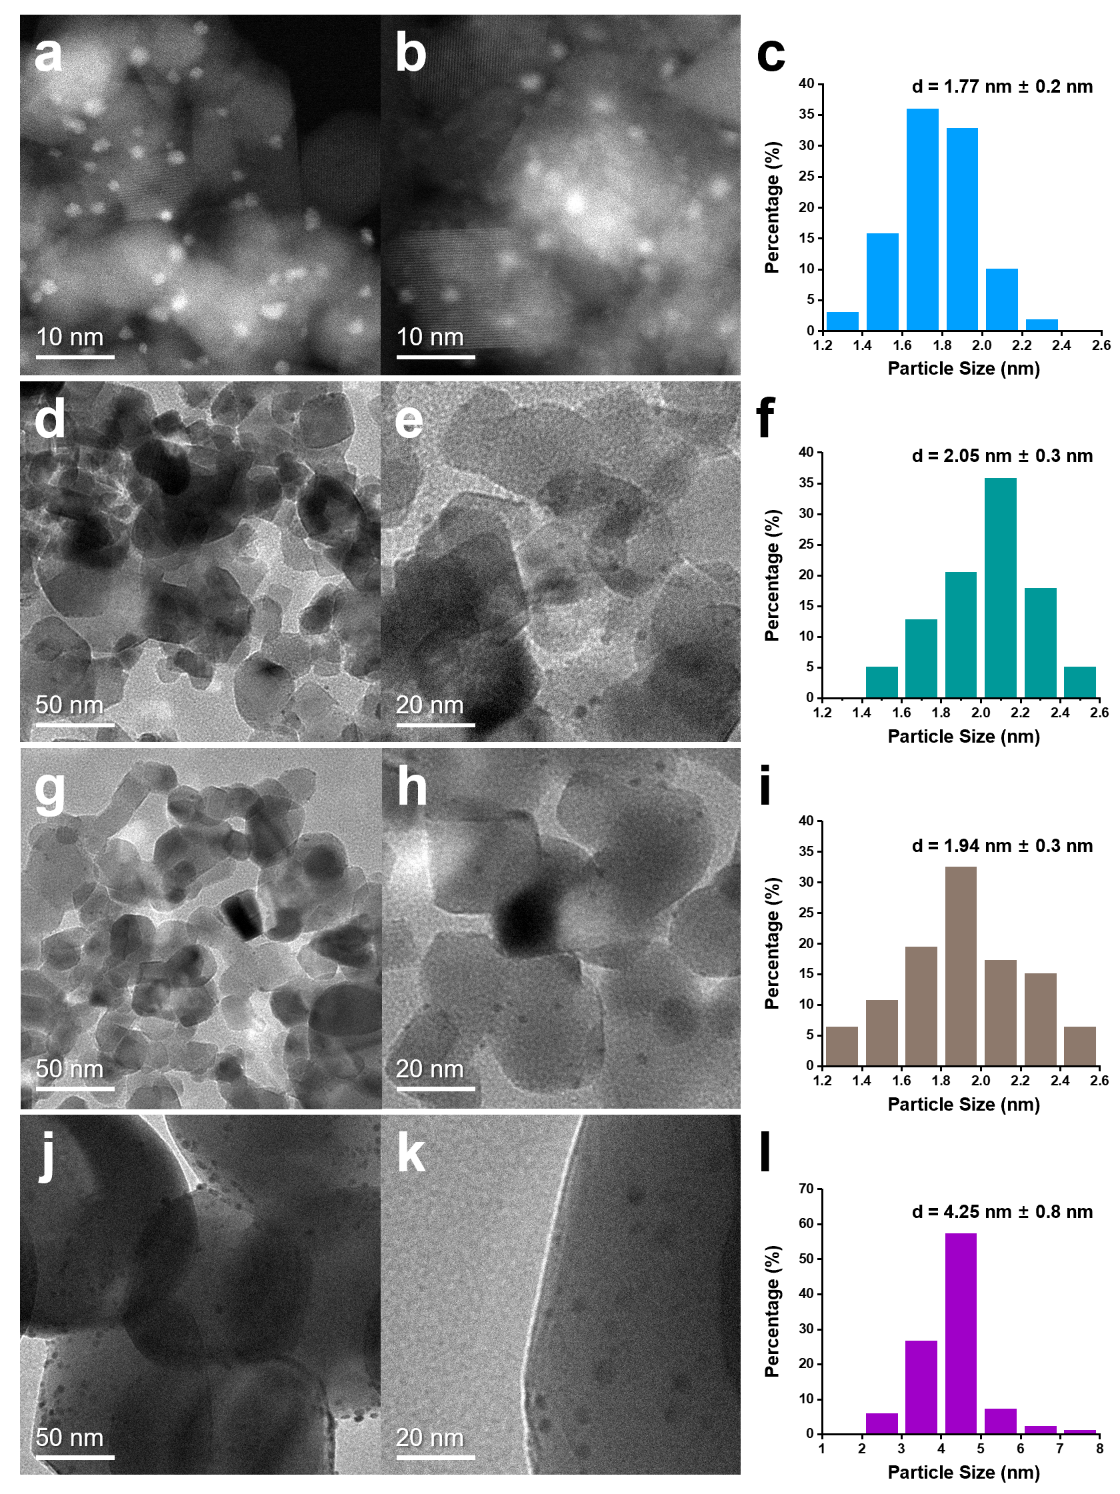
**

**Supplementary Figure 31.** HAADF–STEM images and corresponding Pt NP size distributions of Pt catalysts supported on (a–c) TiO2-r (PTr), (d–f) commercial P25, (g–i) anatase nanopowder, and (j–l) anatase bulk powder.

**Supplementary Table S5.** Specific surface areas of pristine TiO2 samples measured by the BET method.

| **Catalysts** | **Specific surface area  (m2g**–1**)** |
| --- | --- |
| TiO2 nanosheet (001), (TiO2-S) | 70.3 |
| PTS | 69.1 |
| TiO2 large rhombic (101), (TiO2-R) | 14.4 |
| PTR | 13.0 |
| TiO2 small rhombic (101), (TiO2-r) | 119.5 |
| P25 | 51.8 |
| Anatase nanopowder | 52.2 |
| Anatase bulk powder | 8.9 |

**
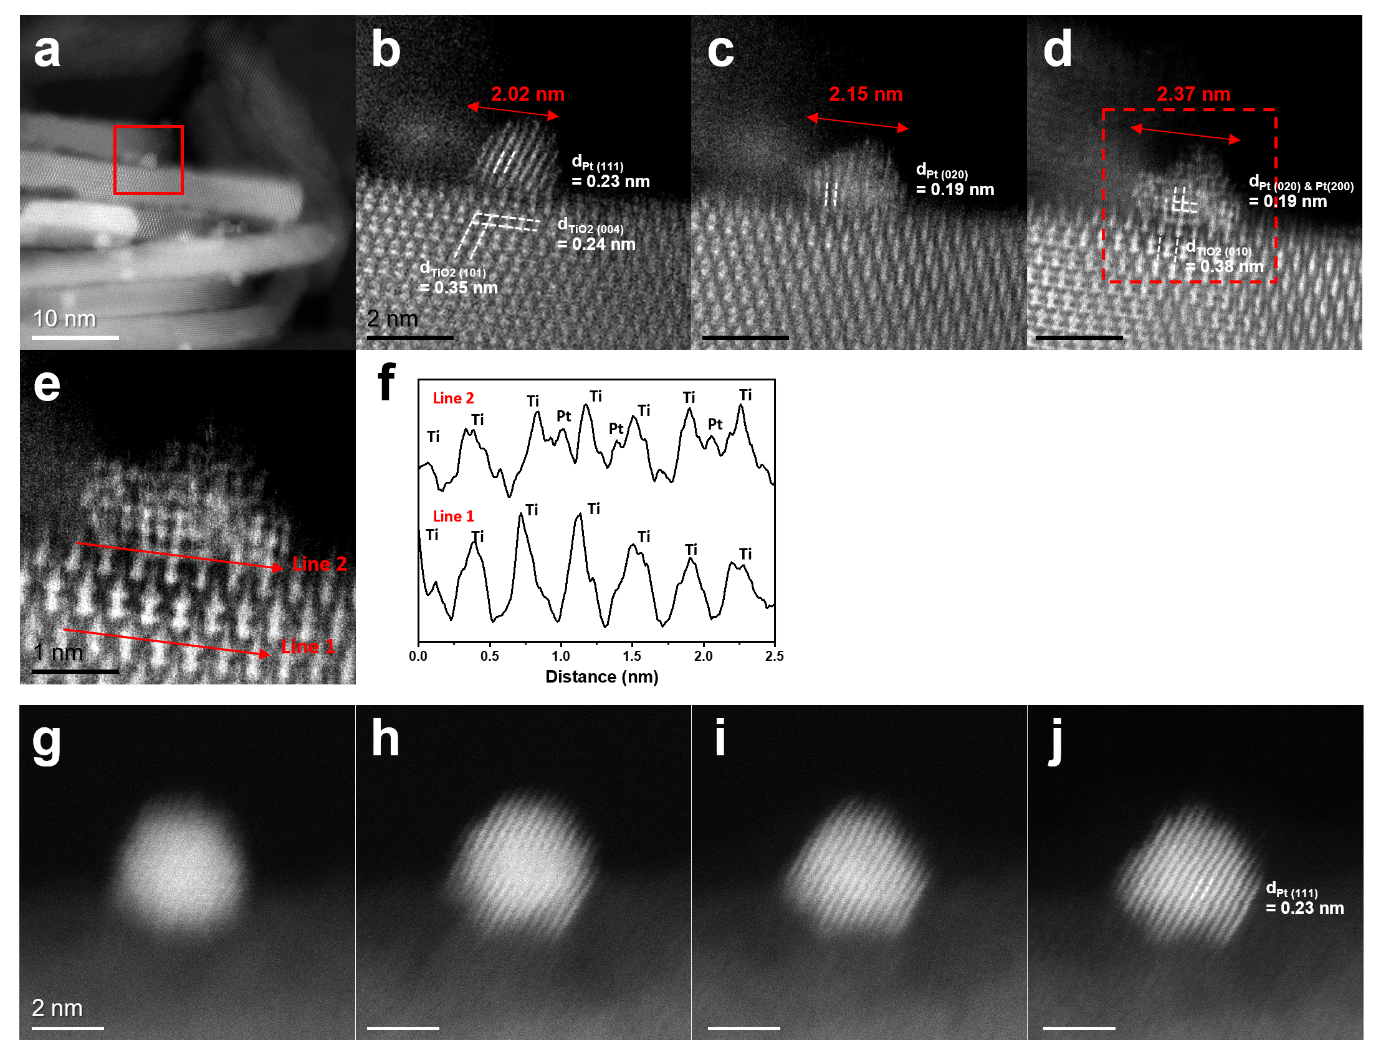
**

**Supplementary Figure 32.** (a) HAADF–STEM image of fresh PTS catalyst. (b–d) Electron beam-induced reconstruction of Pt NPs within the red rectangular region in (a) under magnifications of (b) 5 M, (c) 8 M, and (d) 20 M. (e) Enlarged view of the red dashed rectangle in (d). (f) Intensity profiles extracted along the line in (e), showing changes in lattice spacings during reconstruction. (g–j) HAADF–STEM images of fresh PTR catalyst at magnifications of (g–i) 10 M and (j) 12 M, illustrating beam-induced morphological evolution of Pt NPs.

**
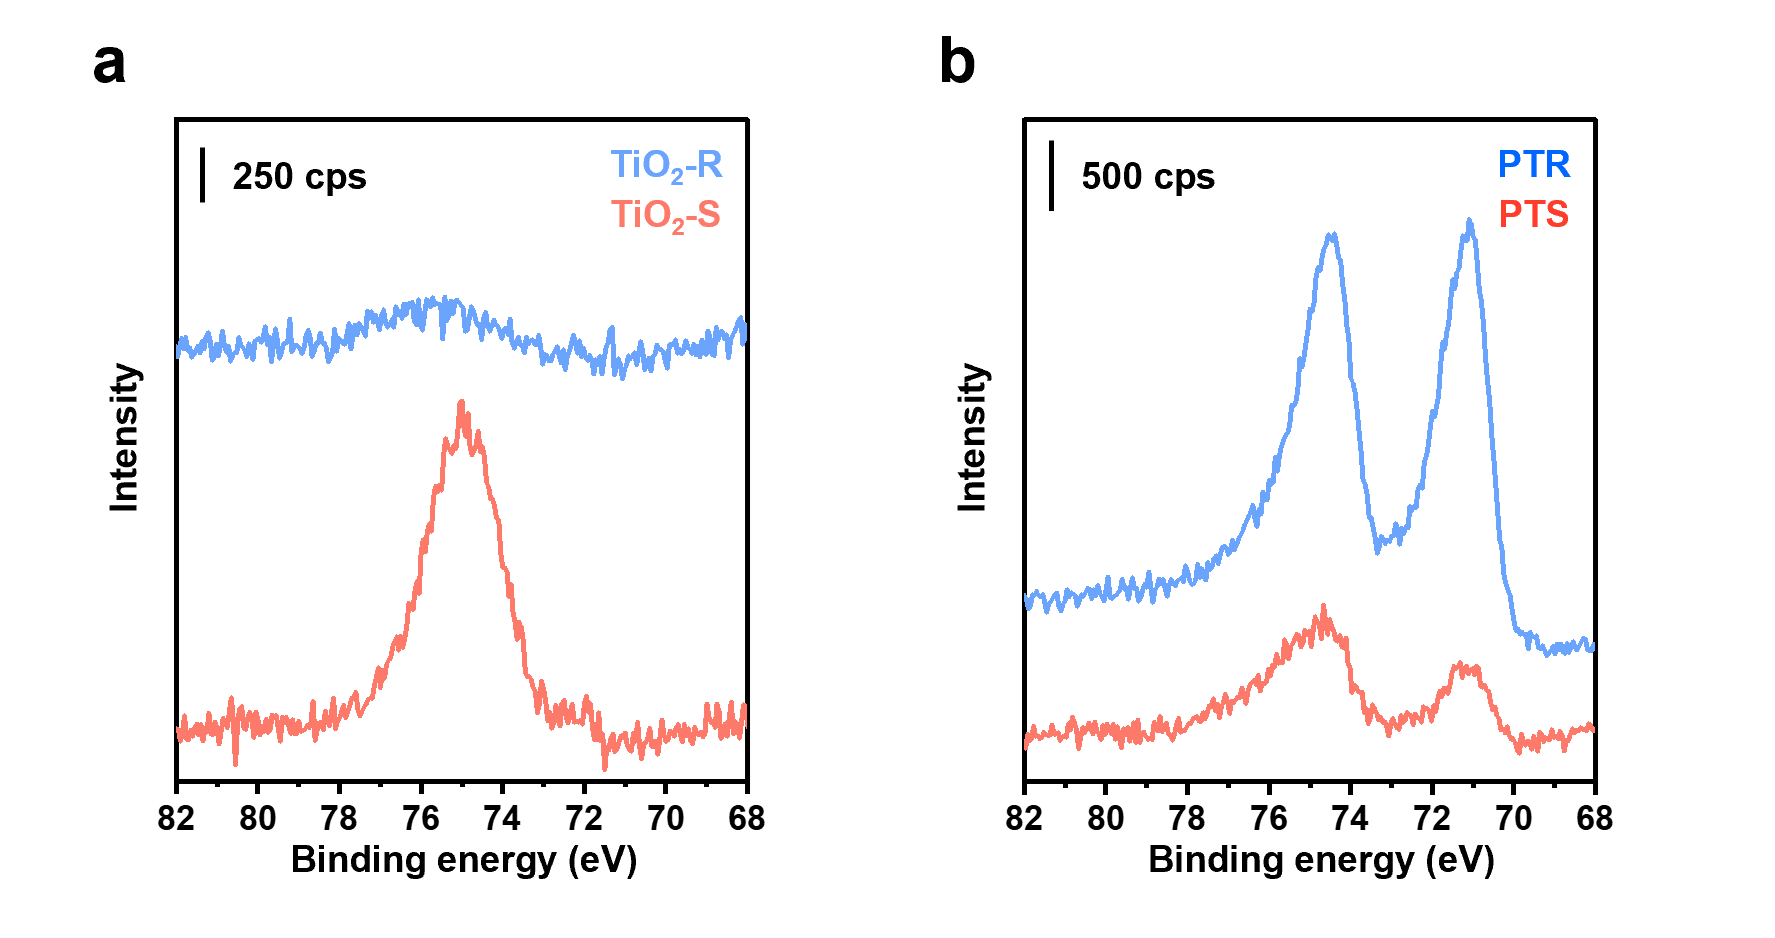
**

**Supplementary Figure 33.** (a) Ti 3*s* satellite spectra of TiO2-S and TiO2-R supports. (b) Pt 4*f* XPS spectra of PTS and PTR catalysts measured under UHV conditions.

**Supplementary Note 1. Methods for Synthesizing Rhombic TiO2 with Predominantly Exposed (101) Facets**

In this study, we compared two anatase TiO2 morphologies with predominantly exposed (001) and (101) facets. The synthesis of TiO2 with predominantly exposed (001) facets typically involves the use of hydrofluoric acid (HF) during the hydrothermal stage, as F– ions inhibit crystal growth along the [001] direction, leading to sheet-like morphologies with extensive (001) exposure. In contrast, anatase TiO₂ with predominantly exposed (101) facets can be obtained via three main strategies: (1) reducing the amount of HF during synthesis,1, 2 (2) employing Ti(OH)4 precursors derived from TiCl4 hydrolysis,3 and and (3) using Na-titanate precursors formed by alkali treatment of commercial P25 TiO2.4 Among these, method (1) tends to result in relatively low (101) facet exposure, so we focused on methods (2) and (3), which are consistent with previous reports on facet-controlled catalysis.3, 5, 6, 7
 As shown in Supplementary Fig. 28, TiO2 synthesized via method (2) exhibited small crystals with rhombic morphology. However, a considerable portion of the sample lacked well-defined shapes. Although this observation is not explicitly discussed in prior studies, similar morphology appears in published TEM images, likely due to the small crystallite sizes (<10 nm edge length). Because this work aims to investigate how exposed TiO2 facets affect Pt NP reconstruction and catalytic CO oxidation, well-defined TiO2 morphologies are essential to isolate the facet effects. Therefore, method (3) was adopted to produce larger rhombic TiO₂ crystals with a high percentage of exposed (101) facets. As shown in Fig. 1, the TiO2 product from method (3) exhibits a well-defined rhombic shape, although the surface area is reduced due to the increased crystallite size

Accordingly, we designated the TiO2 synthesized by method (2) as TiO2-r (small rhombic) and that by method (3) as TiO2-R (large rhombic). The corresponding Pt-supported catalysts are referred to as PTr and PTR, respectively. Supplementary Fig. 29 compares their surface and crystal structures using Raman spectroscopy and XRD. Raman spectra show that TiO2-r exhibits a higher *E*g/*A*1g intensity ratio (1.80) than TiO2-R (2.53), while XRD confirms that all samples retain the anatase phase. This suggests that although TiO2-r maintains the anatase structure, it does not expose the (101) facets as fully as TiO2-R. Thus, TiO2-R was selected for subsequent studies due to its more complete (101) facet exposure, which enables clearer identification of Pt reconstruction on well-defined (101) terrace surfaces.
 To further assess the facet-dependent catalytic activity, we compared Pt/TiO2 catalysts synthesized using these TiO2 supports with those made from commercial TiO2 (P25, anatase nano powder, and bulk powder) (Supplementary Fig. 30). TEM images and Pt particle size distributions are provided in Supplementary Fig. 31. While the catalytic activity generally increased with increasing surface area (Supplementary Table 5), PTS (Pt supported on TiO2 with exposed (001) facets) showed superior activity compared to all other samples, including PTr, despite TiO2-r having 1.7 times larger surface area than TiO2-S. This indicates that the (001) facet of TiO2-S provides a more catalytically active environment for CO oxidation than the (101) facets of TiO2-R or any commercial TiO2 sample.

Taken together, these findings confirm that although surface area is an important factor in catalytic performance, the enhanced activity of PTS originates primarily from the intrinsic reactivity of the exposed (001) facet, not from surface area effects. Therefore, TiO2-R synthesized via method (3) was used in the main study to reliably investigate the influence of the (101) facet on Pt structural evolution and CO oxidation catalysis.

**Supplementary Note 2** **Indirect Evidence of Facet-Dependent Pt Reconstruction on TiO2 Nanosheets with Exposed (001) Facets**

During TEM analysis of the PTS catalyst, it was difficult to manually align the Kikuchi patterns (i.e., zone axis) due to the small crystal size (~3–5 nm) of the TiO2 nanosheets along the [001] direction. Therefore, observations were focused on the side view of the TiO2 nanosheets, which were perpendicularly loaded onto the Cu grid, particularly targeting Pt particles located near the edges of the (001) surface to minimize contrast differences between TiO2 and Pt. As shown in Fig. 2i, our analysis concentrated on the parallel lattice alignment between the Pt (111) and TiO2 (004) planes, in contrast to the atomic-level interfacial structure of PTR discussed in Fig. 3m. We attempted to obtain similar atomic-resolution images of the PTS interface after the reaction; however, resolving the interfacial atomic structure with sufficient clarity remained challenging.

Interestingly, electron beam-induced reconstruction of Pt NPs was observed during STEM imaging of fresh PTS samples. As shown in Supplementary Fig. 32a, a well-aligned fresh PTS specimen exhibited parallel alignment of the Pt (111) plane with the TiO2 (101) plane. Upon increasing magnification to better examine the interfacial structure (Supplementary Figs. 32b–d), we observed beam-induced Pt reconstruction, where the lateral size of a Pt particle increased from 2.02 nm to 2.37 nm, indicating particle spreading. This reconstruction was accompanied by a reduction in the d-spacing from 0.23 nm, characteristic of the Pt (111) plane, to 0.19 nm, corresponding to Pt (200) and (020) planes. During this transformation, the TiO2 (001) surface facilitated partial embedding of Pt into the Ti lattice (Supplementary Figs. 32e, f), resulting in an epitaxial and parallel orientation with the TiO2 (010) and (004) planes. Similar Pt incorporation behavior was previously reported in single-atom Pt/TiO2 nanosheet systems.2 This suggests that the structural characteristics of the TiO2 (001) sheet enable enhanced interaction and epitaxial alignment with Pt NPs, promoting a spread morphology and increased interfacial contact area.

We also observed electron beam-induced reconstruction behavior in the fresh PTR sample (Supplementary Figs. 32g–j), albeit with slightly lower image quality. In this case, Pt particles gradually transformed into sharper cuboctahedral shapes, consistent with the reconstruction behavior observed in the spent PTR sample (Fig. 2l). These transformations are likely driven by oxygen loss from TiO2 under prolonged high-energy beam exposure. Nonetheless, the observations provide indirect yet supportive evidence for the facet-dependent Pt reconstruction behaviors described in the main text for spent Pt/TiO2 catalysts.

**Supplementary Note 3. Challenges in Interpreting AP-XPS Spectra**

To gain a comprehensive understanding of the surface chemical states and valence behavior of the catalysts, we analyzed the *in situ* AP-XPS spectra of the Pt 4*f* region for each sample. As shown in Supplementary Fig. 33, it is important to note that interpretation of the Pt 4*f* region is complicated by the overlap with the Ti 3*s* energy loss feature located near ~75 eV.2, 8 This spectral interference poses a significant challenge to accurate quantification of the Pt 4*f* signals.

The issue is particularly pronounced for TiO2-S and its corresponding Pt/TiO2 catalyst, compared to TiO2-R, due to the relatively low surface density of Pt NPs. Despite similar Pt loading and particle size, the larger surface area of the TiO2 nanosheets in TiO2-S results in a more dilute distribution of Pt, further complicating the detection and deconvolution of Pt 4f signals.

Moreover, variations in the Ti 2*p* and O 1*s* core-level spectra were minimal, likely due to the small contribution of interfacial Pt–TiO2 interactions relative to the overwhelming signal from bulk TiO2. Given these challenges—including spectral overlap, weak Pt signal intensity, and the low proportion of reactive interfacial zones relative to the support bulk—we focused our attention on the O 1*s* region.

Specifically, we examined the behavior of the carbonate-related C=O peak and the corresponding evolution of the CO2(g) signal under CO oxidation conditions. These features provided more interpretable and reliable insights into the dynamic changes occurring at the catalyst surface during reaction, particularly at the Pt–TiO2 interface.

**Reference**

1. Yu, J. et al. Enhanced photocatalytic CO2-reduction activity of anatase TiO2 by coexposed {001} and {101} facets. *J. Am. Chem. Soc.* **136**, 8839-8842 (2014).

2. Zang, W. et al. Distribution of Pt single atom coordination environments on anatase TiO2 supports controls reactivity. *Nat. Commun.* **15**, 998 (2024).

3. Liu, L. et al. Crystal-plane effects on the catalytic properties of Au/TiO2. *ACS Catal.* **3**, 2768-2775 (2013).

4. Yang, M.H. et al. Alkali metal ion assisted synthesis of faceted anatase TiO2. *CrystEngComm* **15**, 2966-2971 (2013).

5. Jia, A. et al. Selective hydrogenation of crotonaldehyde over Ir/TiO2 catalysts: unraveling the metal-support interface related reaction mechanism. *J. Catal.* **425**, 57-69 (2023).

6. Tang, M. et al. Facet-Dependent Oxidative Strong Metal-Support Interactions of Palladium-TiO2 Determined by In Situ Transmission Electron Microscopy. *Angew. Chem. Int. Ed.* **60**, 22339-22344 (2021).

7. Yuan, W. et al. Direct In Situ TEM Visualization and Insight into the Facet-Dependent Sintering Behaviors of Gold on TiO2. *Angew. Chem. Int. Ed.* **57**, 16827-16831 (2018).

8. Chen, J.J. et al. Reverse oxygen spillover triggered by CO adsorption on Sn-doped Pt/TiO2 for low temperature CO oxidation. *Nat. Commun.* **14**, 3477 (2023).
